1  
2  
3  
4  
5  
6  
7  
8  
9  
10  
11  
12  
13  
14  
15  
16  
17  
18  
19  
20  
21

# **Viral genome-capsid core senses host environments to prime RNA release**

**Short Title: Role of RNA in TCV disassembly**

Ranita Ramesh<sup>1</sup>, Sean M. Braet<sup>2</sup>, Varun Venkatakrishnan<sup>2</sup>, Palur Venkata Raghuvamsi<sup>1</sup>, Jonathan Chua Wei Bao<sup>1</sup>, Jan K. Marzinek<sup>2</sup>, Chao Wu<sup>1</sup>, Ruimin Gao<sup>1</sup>, Sek-Man Wong<sup>1,3</sup>, Peter J. Bond<sup>1,4</sup> and Ganesh S. Anand<sup>2</sup>

<sup>1</sup> Department of Biological Sciences, National University of Singapore, 14 Science Drive 4, Singapore 117543

<sup>2</sup>Department of Chemistry, The Pennsylvania State University

<sup>3</sup>Temasek Life Sciences Laboratory, Singapore, Singapore 117604

<sup>4</sup>Bioinformatics Institute, A\*STAR, 30 Biopolis Street, #07-01 Matrix, Singapore 138671

Correspondence: [gsa5089@psu.edu](mailto:gsa5089@psu.edu), [peterjb@bii.a-star.edu.sg](mailto:peterjb@bii.a-star.edu.sg)

22 **ABSTRACT:**

23 Viruses are metastable macromolecular assemblies containing a nucleic acid core packaged by  
24 capsid proteins that are primed to disassemble in host-specific environments leading to genome  
25 release and replication. The mechanism of how viruses sense environmental changes associated  
26 with host entry to prime them for disassembly is unknown. We have applied a combination of  
27 mass spectrometry, cryo-EM, and simulation-assisted structure refinement to Turnip crinkle virus  
28 (TCV), which serves as a model non-enveloped icosahedral virus (Triangulation number = 3, 180  
29 copies/icosahedron). Our results reveal genomic RNA tightly binds a subset of viral coat proteins  
30 to form a stable RNA-capsid core which undergoes conformational switching in response to host-  
31 specific environmental changes. These changes include: i) Depletion of  $\text{Ca}^{2+}$  which triggers viral  
32 particle expansion ii) Increase in osmolytes further disrupt interactions of outer coat proteins from  
33 the RNA-capsid core to promote complete viral disassembly. A cryo-EM structure of the expanded  
34 particle shows that RNA is asymmetrically extruded from a single 5-fold axis during disassembly.  
35 The genomic RNA: capsid protein interactions confer metastability to the TCV capsid and drive  
36 release of RNA from the disassembling virion within the plant host cell.

37 **AUTHOR SUMMARY:**

38 RNA viruses including coronaviruses, dengue, influenza, and HIV are a significant threat to human  
39 health. These viral particles are finely tuned to undergo complex conformational changes that  
40 allow for response to varied environments. Turnip crinkle virus (TCV) serves as an excellent  
41 model for studying RNA virus dynamics. Since TCV is non-enveloped and has no post-  
42 translational modifications, we can specifically investigate the contributions of RNA to viral  
43 dynamics. Genomic RNA is not a passive entity but plays a crucial and previously uncharacterized

44 role in viral disassembly. Our results reveal that the genomic RNA-capsid core serves as an  
45 environmental sensor and undergoes conformational switching in response to host cell conditions.

46

## 47 INTRODUCTION

48 Icosahedral viruses are ubiquitous macromolecular assemblies, consisting of protein  
49 capsids encapsidating nucleic acid genomes. Capsids function to shield the viral genome and  
50 undergo programmed disassembly in favorable host environments in order to release the genome  
51 for replication inside the target host cell. Coat proteins that form the capsid thus function as  
52 metastable sensors of environmental conditions through reversible ‘breathing’ motions [1,2] and  
53 can be likened to delivery vehicles of genetic material transmitted from one host to another. Cryo-  
54 electron microscopy (cryo-EM) has provided high resolution snapshots of virus icosahedral  
55 geometries [3]. However, static structural snapshots cannot capture intrinsic breathing dynamics  
56 [4,5] of the virus particle, and largely report on more structured elements of the virus particle and  
57 offer only limited insights into the interior of the viral particle.

58 Whole viral particle dynamics are fundamental to understanding a virus’s structural  
59 responses to environmental changes [6]. Viruses are programmed to sense and respond to unique  
60 host specific physical perturbations such as changes in osmolyte concentration [7], pH [8] and  
61 temperature [9], or chemical perturbations such as changes in divalent cation concentrations [10].  
62 Currently, viral recognition and responses to host environments is poorly understood. Here, we  
63 describe the intrinsic dynamics of virus particles and changes in conformation associated with  
64 host-specific environments *in vitro*.

65 We selected Turnip crinkle virus (TCV), a plant RNA icosahedral virus model for mapping  
66 changes in viral particle conformation and dynamics across varying plant host-specific

67 environments. TCV offers numerous advantages: It is a simple non-enveloped virus lacking lipids  
68 and post-translational glycosylation modifications and consists entirely of 180 copies of a viral  
69 capsid coat protein (38 kDa) arranged in T=3 icosahedral symmetry and encapsulating a 4.1 kb  
70 ssRNA genome [11]. Each coat protein subunit consists of 3 domains – an N-terminal RNA  
71 binding (R) domain, a Shell (S) domain, and a C-terminal Protruding (P) domain. This basic unit  
72 consists of a trimer of 3 quasi equivalent conformations - A, B and C - that differ in their hinge  
73 angles between the S and P domains and folding of the connecting arm linking R and S domains  
74 [12]. Upon entry into a host plant cell, TCV undergoes preferential disassembly to release genomic  
75 RNA into the associated high osmolyte environment with concomitant depletion of divalent  $\text{Ca}^{2+}$   
76 ions in the host cytosol (Fig 1). Release of viral RNA without complete disassembly has also been  
77 observed whereby chelation of divalent  $\text{Ca}^{2+}$  ions results in a large expansion in particle size  
78 (disassembly intermediate). Subsequent proteolytic processing of the expanded viral particle by  
79 host proteases facilitates ribosomal-mediated extrusion (striposomal release) of genomic RNA into  
80 the plant host [13].

81 Cryo-EM structures of the native virus and expanded disassembly intermediates have  
82 previously been solved at low resolution (11 and 18 Å respectively). These structures show a  
83 disordered arm in the A and B conformations and more folded structure in the C conformation.  
84 The A subunits form the 5-fold axis, while the B and C subunits form the 3-fold (or quasi 6-fold)  
85 axis. The arms of the C subunit form a beta annulus structure at the 3-fold axis that has been  
86 postulated to be involved in RNA binding [13].

87 To obtain additional insights into the interior of the virus particle, we have carried out  
88 orthogonal cryo-EM, simulation-assisted structure refinement, and amide hydrogen/deuterium  
89 exchange mass spectrometry (HDXMS) analysis of the different states of TCV. HDXMS is a

90 powerful technique that can be used to identify regions involved in conformational changes within  
91 a protein, and within protein-protein, protein-lipid, protein-ligand or protein-nucleic acid  
92 interfaces by reporting on hydrogen bonding and solvent accessibility [14,15]. HDXMS also  
93 allows detection of multiple conformational populations in solution and has been combined with  
94 variable urea denaturation to estimate the relative strengths of the icosahedral viral assembly  
95 [16,17].

96 We report a high resolution (3.2 Å) map that clearly shows the asymmetry in the interior  
97 of the TCV particle and captures TCV in the process of releasing its genomic RNA into the host  
98 plant cell. While the icosahedral geometry can be clearly described at this resolution, the specific  
99 RNA-R domain binding interactions inside the whole virus particle are still unresolved and reflect  
100 a highly dynamic interior, corroborated by HDXMS. Our findings further reveal a highly  
101 disordered R-domain that is composed of genomic RNA-tightly bound (~5.7%) capsid protein.  
102 Significantly, a majority of the capsid protein (~94.3%) is only loosely bound to the genomic  
103 RNA-capsid core. The basis for the TCV virion assembly lies in a subset of the capsid protein  
104 population binding strongly to RNA to generate a ribonucleoprotein core capable of nucleating  
105 assembly of many more capsid protein units to generate an icosahedral particle. The intrinsic  
106 metastability of native TCV is explained by the interplay between the small subset of strong capsid  
107 RNA interactions holding together the RNA-capsid core and weaker capsid interactions  
108 maintaining the icosahedral geometry. Far from being a passive entity, the genomic RNA-capsid  
109 core complex is the ‘controller switch’ for virus assembly-disassembly transitions.

110 **RESULTS**

111

112 **R domain of coat protein shows greatest relative deuterium exchange**

113 HDXMS of TCV at  $t = 1, 10$  and  $30$  min, covering the fast deuterium exchange kinetic  
114 timescales [18] was carried out as described in Materials and Methods. 61 peptides with high signal  
115 to noise spanning the entire TCV coat protein with 89.2% sequence coverage were obtained (S1  
116 Fig and S1 Table).

117 Of the three domains, the R domain showed the greatest magnitude exchange while the S  
118 and P domains showed lower relative exchange overall, consistent with the R domain being the  
119 least structurally ordered domain (Fig 2A). Mass spectral envelopes of N-terminal peptides  
120 spanning the R domain upon deuterium exchange showed two distinct populations corresponding  
121 to a low exchanging (blue) and high exchanging (green) population respectively (Fig 2B). These  
122 were deconvolved using HDExaminer 3.0 as previously reported [19]. The low exchanging  
123 population showed no increases in exchange with time while the mass spectral envelope of the  
124 higher exchanging population shifted to the right in the deuteration times examined. Bimodal  
125 deuterium exchange profiles for all times ( $t = 1, 10$  and  $30$  min) were observed for the 19 N-  
126 terminal fragment peptides and not observed for any of the peptides from the S or P domains (Fig  
127 2C and 2D). We report peptide 66-89 as a reference peptide to quantitate the abundance of low  
128 and high exchanging populations in native TCV, which was consistent with other R domain  
129 peptides. A small (5.7%) fraction of the R domain in the native TCV virus particle with lower  
130 exchange ( $\sim 6.2$  Da) while a majority of the R domain ( $\sim 94.3\%$ ) showed a higher exchange ( $\sim 11.7$   
131 Da) (S2 Fig).

132

133 **TCV expansion shows enhanced deuterium exchange at quasi 3-fold axes along with changes**  
134 **in R-domain ensemble behavior**

135 To capture conformational changes associated with particle expansion, we next carried out  
136 HDXMS of expanded TCV which was generated by chelation of Ca<sup>2+</sup> with EDTA. Differences in  
137 exchange between the expanded and native TCV particles are represented as a deuterium exchange  
138 difference plot (Fig 3A). Increases in exchange were observed predominantly in the S domain.  
139 These regions exhibiting increases in exchange greater than 0.5 D are indicated in red (Fig 3B).  
140 Increases in exchange observed at peptides spanning 170-176 and 196-208 of the S domain  
141 correspond to the region flanking the quasi 3-fold axis which shows increases in solvent  
142 accessibility, confirming particle expansion. This can be observed through shifts in the mass  
143 centroids of spectral envelopes from the native to the expanded state in representative peptide 150-  
144 159 (Fig 3D). Increases in exchange were additionally observed at the 3-fold and 5-fold axes,  
145 corroborating our previous results showing these loci as hotspots for TCV disassembly [16].

146 The R domain peptides once again showed a characteristic bimodal exchange profile as  
147 seen in native TCV (Fig 3C). Deconvolution of mass spectra indicated a larger percentage of the  
148 lower exchanging population (~13.6%) compared to native TCV for peptide 66-89 (S2 Fig).  
149 Further, the average deuterium exchange observed for this population was much lower (~1.8 Da)  
150 in expanded relative to native TCV. The higher exchanging population in both states showed  
151 comparable average deuterium exchange (~12.7 Da) (S2 Fig).

152

153 **Expansion elicits conformational rearrangements in RNP**

154 There are two possible explanations for the bimodal isotopic envelopes observed within  
155 the mass spectra of deuterated peptides from the R domain. Either the R domain populates a more

156 folded and ordered conformation (low exchanging), and a disordered conformation (high  
157 exchanging) which would be consistent with EX1 kinetics of HD exchange [20], or the two  
158 populations reflect a differential effect of the RNA genome on the R domain. To identify the two  
159 populations of TCV capsid protein R domain in solution, we disassembled TCV by chelating  $\text{Ca}^{2+}$   
160 through addition of EDTA and introducing high osmolality (>500 mM NaCl). SDS-PAGE gels of  
161 limited chymotrypsin proteolysis of TCV in the presence of 250/500 mM NaCl indicated complete  
162 cleavage of the 38 kDa coat protein to the 30 kDa cleavage product confirming complete  
163 disassembly (S3 Fig) [21,22]. We next resolved the two conformations with size-exclusion  
164 chromatography (SEC) broadly into two fractions consisting of RNA bound TCV coat protein  
165 (RNA-capsid core-complex) and the RNA-free TCV coat protein (Fig 4A) as described [21]. This  
166 allowed comparative HDXMS of a disassembled and chromatographically resolved higher  
167 molecular weight fraction containing genomic RNA-capsid core-complex alone, disassembled  
168 TCV, and native virus (Fig 4B).

169         The RNA-bound fraction showed low deuterium exchange for the R domain peptides while  
170 the RNA-free fraction corresponded to the higher exchanging population. Figure 4B shows the  
171 mass spectra of deuterium exchanged peptide (66-89) for the two fractions in the disassembled  
172 virus in comparison to native TCV. The isotopic envelope of the RNA bound population (Peak 1)  
173 can be seen corresponding to the lower exchanging envelope in the corresponding native virus.  
174 TCV incubated with 500 mM NaCl contains a mixture of both high and low exchanging  
175 populations (Peaks 1 and 2) and the low exchanging population corresponds to the lower exchange  
176 in the RNA-capsid core-complex implying that the low exchanging population in the native virus  
177 particle represented the proportion of the R domain tightly bound to genomic RNA.



178           Importantly, the higher exchanging population of the native state showed lower deuterium  
179 exchange compared to free coat protein from the disassembled virus (Fig 4B). This indicated that  
180 the higher exchanging population represented the fraction of R domain peripherally bound to the  
181 genomic RNA in the native particle, which is disrupted by high salt, leading to disassembly of  
182 TCV into the RNA-capsid core-complex and free TCV coat proteins. While mass spectra of all the  
183 deuterium exchanged R domain peptides allowed an estimate (~13.6%) of the relative abundance  
184 of RNA-bound and free coat protein, the mass spectra of deuterium exchanged peptide 66-89 alone  
185 allowed the most accurate quantitation to a baseline resolution estimate of the relative abundance  
186 of RNA-bound and RNA-free TCV coat protein (S2 Table).

187

### 188 **Structure of Expanded TCV at 3.2 Å resolution shows RNA primed for release at 5' fold axis**

189           In order to establish if R-domain interactions with genomic RNA were uniformly  
190 distributed across the expanded TCV particle, we solved the structure of expanded TCV, generated  
191 at pH 5.4 using molecular dynamics flexible fitting (MDFF) [23]. While a structure of expanded  
192 TCV has been previously reported [13], it has been solved at low resolution (~17Å) and offers  
193 limited insights of the interior of the virus particle containing the more dynamic core of the virus  
194 containing genomic RNA and associated capsid.

195           During MD simulations of the complete viral particle, an additional biasing potential based  
196 on the cryo-EM map was applied. Forces proportional to the gradient of the density map trigger  
197 the gradual transition of the structure towards the experimental map. The native TCV coordinates  
198 solved at pH 7.4 (PDB: 3ZX8) were used as the starting point [13]. Initial fitting with the TCV at  
199 pH 5.4 density map determined at ~3.2 Å resulted in a correlation of ~0.41 (see Methods for  
200 details). We next trimmed the low pH map around the TCV trimeric subunit made of the 3 quasi

201 equivalent conformations A, B and C in their native state, and then applied MDFF to progressively  
202 fit the structure into the map over 50 ns of simulation (Fig 5). Following the MDFF procedure, the  
203 backbone root mean square deviation (RMSD) of the trimer was measured with respect to the final  
204 expanded coordinates, without least-squares fitting, revealing a gradual reduction in RMSD from  
205 ~7 to 0 Å (S4A Fig). This reflected an overall translational motion of the trimer during radial  
206 expansion of the capsid. However, the trimer retained its native structure and interface; when  
207 performing a least-squares fit of the final conformation compared to the initial structure, a lower  
208 backbone RMSD of ~3.2 Å was measured, thus retaining the close proximity of key acidic residues  
209 at the quasi 3-fold axis that coordinate Ca<sup>2+</sup> (S4B Fig).

210         The final fitted trimeric coordinates were aligned onto the 60 subunits of the initial TCV  
211 model. This resulted in an accurate model for the expanded state of the virus, as evidenced by a  
212 correlation measured with respect to the low pH density map of ~0.80, representing a significant  
213 improvement in comparison to the initial fit (~0.41). The final coordinates together with the  
214 corresponding cryo-EM density map of the expanded TCV at low pH are shown (Fig 5). This  
215 reveals not only a larger diameter of the capsid when compared to the native structure, but  
216 interestingly asymmetric packing at the 5-fold axes with the pentamers protruding outwards from  
217 the TCV. Importantly, the protrusion point is likely the single copy of the covalently bound p80  
218 dimer. The p80 dimer is preferentially labelled by I<sup>125</sup>, showing it to be on the surface. It is  
219 additionally part of the RNA-bound core protein, implicated as the last segment of RNA to undergo  
220 condensation during assembly and correspondingly, the first RNA-coat protein segment to be  
221 released from the viral particle [24]. This reveals the asymmetric packing of RNA within the TCV  
222 virion and allows visualization of a viral RNA genome in the process of release. Even at a 3.2 Å  
223 resolution we were unable to capture the structure of the RNA within the particle indicating that

224 the genomic RNA in the interior of the particle is highly dynamic. The increased proportion of  
225 RNA-bound R domain can be attributed to enhanced interactions mediated by protruding RNA at  
226 the 5' fold site with proximal R domain.

227

228 **A stable RNP complex is retained upon complete TCV disassembly in the presence of**  
229 **osmolyte**

230 The expanded particle undergoes full disassembly upon addition of osmolyte (Fig 4). To  
231 map changes accompanying disassembly, we carried out HDXMS in three osmolyte (NaCl)  
232 concentrations (100 mM, 250 mM, and 500 mM). We observed increased exchange in the high  
233 exchanging population of the R domain (peptide 66-89 in S5A Fig) and at the 5-fold/3fold axis  
234 (peptide 135-154 in S5B Fig) corresponding to particle disassembly. At 250 mM NaCl the TCV  
235 particle showed nearly complete disassembly as shown in the difference plot in S5C Figure.  
236 Interestingly, the low exchanging RNA bound fraction of R domain did not show significantly  
237 increased exchange under high osmolyte conditions, suggesting that the RNP complex is  
238 maintained upon complete disassembly (S5A Fig).

239

## 240 **DISCUSSION**

241 Viruses are evolutionarily built to encounter multiple environments within and outside  
242 hosts during their lifecycle. Abiotic changes such as temperature, pH, osmolyte, and divalent  
243 cations can all serve as indicators for the virus while seeking favorable conditions for disassembly.  
244 RNA viruses including Dengue, flaviviruses and the common cold undergo dynamic breathing  
245 motions in order to modulate behavior under these changing conditions and to help evade host

246 defences [19]. A holistic view is needed to account for the contributions of the structure of the  
247 viral particle as well the dynamic changes that occur in the disordered interior. We have uniquely  
248 carried out doing dynamics measurements with HDXMS in conjunction with orthogonal cryo-EM.  
249 This combination allows for a complete view of viral response to environmental perturbations.

250         The RNA-protein interface is a critical and poorly understood component of viral  
251 dynamics. TCV has no lipids and no glycosylation modifications offering a deeper view into the  
252 role of RNA-protein interactions in viral disassembly. The simplicity of TCV means that the viral  
253 capsid protein must have an inbuilt efficiency in order to function in many roles including as a  
254 scaffold for genomic RNA and as a sensor for environmental perturbations. We have outlined the  
255 changes in TCV capsid protein during disassembly where the particle responds to changes in  
256 divalent cations and osmolyte in host plant cells during disassembly.

257         Viruses are highly dynamic biomolecular entities undergoing molecular motions of varying  
258 timescales that facilitate replication within host cells. This study has offered key insights into the  
259 virus interior that is structurally poorly resolved and has revealed the key sensors of viral  
260 metastability at the RNA-R domain interface. From cryo-EM, it was predicted that genomic RNA  
261 mediates strong interactions with ~30% of the coat protein R domains, potentially correlated with  
262 the formation of the folded arm of the C quasi equivalent conformation [21]. Our results reveal  
263 that the R domain provides the main interface for RNA binding and presents a more accurate  
264 smaller percentage of 5.7% being RNA-bound in native TCV. This represents the RNA-bound  
265 capsid core of TCV. The remaining relatively free coat protein in the (~94.3%) fraction is loosely  
266 bound to the RNA-capsid protein core in native TCV (Fig 6).

267         These results reveal the critical importance of the genomic RNA capsid protein complex  
268 to function as a sensor for the host environment. Increased osmolyte and decreased  $\text{Ca}^{2+}$  in the

269 host environment disrupts weak contacts between the capsid and RNA genome during expansion.  
270 Conformational changes in the genomic RNA-capsid core lead to the detection of a major  
271 (~86.4%) unbound population of R domain, and a minor (~15%) strongly bound population of R  
272 domain in the expanded particle. This conformational change primes the RNA for future release.  
273 Release can then occur *in vitro* in the presence of high osmolality (500 mM NaCl) which leads to  
274 continued association of the RNA-capsid core. *In vivo*, the primed RNA genome is extruded from  
275 the expanded particle by cellular ribosomes as was shown previously [13].

276 Our cryo-EM analysis has revealed that the genomic RNA-capsid interactions are not  
277 equally distributed throughout the expanded particle. Instead, an asymmetric packaging was  
278 observed with a protrusion point a one specific 5-fold axis that also likely represents the covalent  
279 p80 dimer. Additionally, increased density from the interior of the particle can be seen near this  
280 protrusion point. The covalent dimer is also part of the genome capsid core during assembly,  
281 suggesting that the genomic RNA acts as a nucleation point for the RNA capsid core during  
282 assembly. This RNA-capsid core is then maintained in the whole viral particle and mediates viral  
283 metastability and environmental sensing. During the disassembly process, the RNA directs  
284 extrusion toward one specific 5-fold axis.

285 These results underscore the significance of RNA structure and conformational dynamics  
286 of RNA-capsid cores in viral sensing and disassembly. We have tracked dynamics of TCV through  
287 the entire particle disassembly process (Fig 6). During disassembly, the TCV particle goes through  
288 an expanded intermediate state upon  $\text{Ca}^{2+}$  depletions. TCV particle expansion also corresponds to  
289 an increase in the fraction of tightly bound RNA-R domain and conformational changes in the  
290 RNA-capsid core. Under high osmolyte conditions, the virion is disassembled into the RNA-capsid  
291 core (15% of the total coat protein) and free coat protein. In the host cell environment, ribosomes

292 along with protease activity extrude the emerging RNA during disassembly [13]. The principles  
293 governing how RNA self assembles and disassembles upon sensing the optimal environmental  
294 cues are still to be understood. However, it is clear that the genomic RNA is in fact not a passively  
295 packaged entity but instead plays a key role throughout the TCV viral lifecycle as an environmental  
296 sensor and a driving force behind viral disassembly.

297

## 298 **MATERIALS AND METHODS**

299

### 300 **Purification of virus particles and size exclusion chromatography**

301 Native TCV particle purification was adapted based on a protocol described previously  
302 [25]. About 100 g of infected leaves were homogenized in a cold blender with 300 mL pre-chilled  
303 extraction buffer (0.2 M NaOAc, 50 mM NaCl, 20 mM CaCl<sub>2</sub>, 5 mM EDTA, 0.1% 2-  
304 Mercaptoethanol pH 5.4) for 10 min, with a 30 s pause for every minute. The resulting slurry was  
305 centrifuged for 15 min at 9000 rpm at 4 °C using a JA14 rotor (Beckman Coulter, Brea, CA). The  
306 supernatant was filtered with a Miracloth and kept on ice. Equal volumes of supernatant and  
307 ammonium sulfate were mixed and incubated at 4° C for 3 hours followed by centrifugation at  
308 9000 rpm at 4 °C (JA14). The pellets obtained were resuspended in a total of 50 mL of  
309 resuspension buffer (50 mM NaOAc, 50 mM NaCl, 20 mM CaCl<sub>2</sub>, 0.1% 2-Mercaptoethanol, 1%  
310 Triton-X pH 5.4) and left to gently shake overnight at 4 °C. The virus was pelleted by  
311 centrifugation at 9000 rpm with JA14 at 4 °C and the supernatant was transferred to an SW28 tube.  
312 4 mL of 10% (w/v) sucrose was transferred to the bottom of the tube using a Pasteur pipette and  
313 centrifuged at 27,000 rpm for 3 hours at 4° C using an SW28 Ti rotor (Beckman Coulter, Brea,

314 CA). Each pellet containing the virus particles was resuspended in 1 mL resuspension buffer  
315 overnight with gentle shaking at 4 °C. All purification steps were performed at 4°C.

316 Resuspended particles were layered onto a 15-45% (w/v) cesium chloride continuous  
317 density gradient in resuspension buffer and centrifuged at 34,000 m for 5 hours at 20 °C using an  
318 SW41 Ti rotor (Beckman Coulter, Brea, CA). The virus particles were observed in the lower of  
319 two pale white bands in the gradient; these were extracted and dialyzed against 25 mM Tris pH  
320 7.5 at 4 °C and measured using a Nanodrop One (Thermo Fisher Scientific, Waltham, MA).  
321 Particles for cryo-EM were dialyzed against 20 mM NaOAc, pH 5.4 at 4 °C. ~5 mg TCV native  
322 particles were incubated overnight at a final concentration of 25 mM Tris, 5 mM EDTA, 500 mM  
323 NaCl pH 7.5 (dissociation buffer). The resulting dissociated particles were subjected to size  
324 exclusion chromatography using a Superdex™ 200 16/60 GL column pre-equilibrated with 2  
325 column volumes of dissociation buffer, in an AKTA™ FPLC system (General Electric Healthcare,  
326 Chicago, IL). Peaks 1 and 2 were collected and identified as the RNA-capsid core-complex and  
327 free protein as previously suggested [21].

328

### 329 **Genomic RNA transcription**

330 cDNA stretches corresponding to the 3' UTR region of TCV genomic RNA (5'-  
331 CAACUGAGGAGCAGCCAAAGGGUAAAUUGCAAGCACUCAGAAU-3') were obtained  
332 from GenScript [26]. ssRNA transcription was performed using Ambion MEGAscript RNAi Kit  
333 obtaining ~2500 ng/μl of pure RNA. TCV coat protein was incubated with TCV RNA for 30 min  
334 on ice at a molar ratio of 1:1 prior to the deuterium exchange reaction [22]

335

### 336 **Amide Hydrogen Deuterium Exchange**

337 Virus samples were treated with buffers as mentioned: Native (25 mM Tris, pH 7.5), NaCl  
338 titration (25 mM Tris, 5 mM EDTA, 0.1/0.25/0.5 mM NaCl, pH 7.5) to monitor conformations of  
339 native, Ca<sup>2+</sup>-depleted and in increasing osmolyte environments. All samples were diluted to a final  
340 concentration of 93.3% D<sub>2</sub>O to initiate the deuterium exchange reaction. Deuterium buffers were  
341 prepared by desiccation of respective aqueous buffers and reconstituted in equivalent volumes of  
342 D<sub>2</sub>O. Deuterium exchange was carried out at room temperature (26 °C) maintained on a drybath  
343 for 1, 10 and 30 min followed by rapidly quenching the reaction to minimize back exchange using  
344 4 M GdnHCl and 0.1% TFA on ice to bring the pH down to 2.5.

345

#### 346 **Pepsin proteolysis and mass spectrometry analysis**

347 Quenched samples were injected onto an immobilized pepsin treatment (BEH Pepsin  
348 Column, Enzymate, Waters, Milford, MA) using a nano-UPLC sample manager at a constant flow  
349 rate of 100 µl/min of 0.1% formic acid. Proteolyzed peptides were then trapped in a VanGuard  
350 column (ACQUITY BEH C18 VanGuard Pre-column, 1.7 µm, Waters, Milford, MA) and  
351 separated using a reversed phase liquid chromatography column (ACQUITY UPLC BEH C18  
352 Column, 1.0 × 100 mm, 1.7 µm, Waters, Milford MA). NanoACQUITY binary solvent manager  
353 (Waters, Milford, MA) was used to pump an 8-40% acetonitrile gradient at pH 2.5 with 0.1%  
354 formic acid at a flow rate of 40 µl/min and analyzed on a SYNAPT G2-S<sub>i</sub> mass spectrometer  
355 (Waters, Milford, MA) acquired in MS<sup>E</sup> mode [6].

356 Undeuterated TCV particles were sequenced by MS<sup>E</sup> to identify pepsin digested peptides  
357 using Protein Lynx Global Server Software (PLGS v3.0) (Waters, Milford, MA). The peptides  
358 were identified by searching against the TCV coat protein sequence database (UniProt ID: P06663)  
359 with a non-specific proteolysis enzyme selected. Peptides from the undeuterated samples that were



360 identified and matched from the primary sequence database were filtered and considered with the  
361 following specifications: precursor ion tolerance of < 10 ppm, products per amino acid of at least  
362 0.2 and a minimum intensity of 1000.

363 Average deuterium exchange in each peptide was measured relative to undeuterated control  
364 peptides using DynamX v3.0 (Waters, Milford, MA) by determining the centroid mass of each  
365 isotopic envelope. Subtractions of these centroids for each peptide from the undeuterated centroid  
366 determined the average number of deuterons exchanged in each peptide [18]. For bimodal  
367 populations, centroid masses of each individual population were assessed independently.  
368 Percentage of each exchanging conformation was calculated as the ratio of intensity of ion sticks  
369 corresponding to each conformation divided to the total intensity sum of all ion sticks associated  
370 with deuterium exchange for that peptide.

371 Deuterium exchange for all peptides is represented using relative fractional uptake (RFU)  
372 plots. Each value reported is an average of three independent deuterium exchange experiments and  
373 not corrected for back-exchange [6]. Difference plots were made by subtracting absolute centroid  
374 mass values between the two states under consideration. A difference of  $\pm 0.5$  Da was considered  
375 a significance threshold for deuterium exchange [27].

376

### 377 **Deconvolution analysis of deuterium exchange mass spectral envelopes**

378 Deconvolution of mass spectral envelopes was carried out by HDExaminer version 3.2  
379 (Sierra Analytics, Modesto CA) to check for ensemble behavior in solution, specifically to check  
380 for two distinct distributions of mass spectral envelopes [19]. Each of these envelopes would  
381 represent distinct conformations in solution [20]. We set a threshold fit value score of 0.9 for the  
382 goodness of fit of the experimental mass spectral envelope for deuterium exchanged peptides

383 with the theoretical envelope. If the fit score for a peptide is less than the threshold, the program  
384 will fit the spectral envelope to a bimodal distribution. If the score of the bimodal distribution is  
385 greater than that of the unimodal distribution, the program assigns a lower exchanging (left  
386 population) and a higher exchanging (right population). Results from deconvolution for mass  
387 spectra (peptide 66-89) for each of the three states are shown in S. Figure 2 and S. Table 2 and 3.

388

### 389 **Limited chymotrypsin proteolysis**

390 Native, expanded and disassembled TCV particles (native and increasing concentrations  
391 of NaCl) were treated with Chymotrypsin for 10 min at a ratio of 1:100 of protease-protein (w/w)  
392 at room temperature as described previously [13].

393

### 394 **Cryo-electron microscopy**

395 5  $\mu$ l (2 mg/ml) of TCV purified virions suspended in 20 mM NaOAc (pH 5.4) were applied  
396 onto the holey carbon grid (Quantfoil 2/2 200 mesh) after 1 minute glow-discharge, subsequently  
397 the grid was blotted and plunge frozen with Vitrobot Mark IV(Thermo Fisher Scientific, USA).  
398 The grids were loaded into Titan Krios Cryo-electron microscope (Thermo Fisher Scientific, USA)  
399 and more than 3000 micrographs was collected at nominal magnification of 96 kX (pixel size 0.89  
400  $\text{\AA}$ ) with Falcon-II CMOS electron detector (Thermo Fisher Scientific). A total of 19353 virus  
401 particles were picked manually, and the particle set was processed with Frealign v9.09 for 3D  
402 reconstruction and refinement. The final resolution reached 3.2  $\text{\AA}$ .

403

### 404 **Molecular dynamics flexible fitting (MDFF)**

405           The UCSF Chimera software was used to trim the low pH map around the TCV trimer as  
406 well as to fit and calculate the correlation of the atomic structure into the cryo-EM density map  
407 [28]. The correlation between fitted coordinates and the density map varies from -1 to +1, from  
408 decorrelated to identical, respectively. The *Fit in Map* function in Chimera locally optimizes the  
409 fit of atomic coordinates into the density map using translation and rotation by maximizing their  
410 overlap.

411           Each of the monomers of TCV corresponded to residue numbers 53-351, where the first  
412 52 residues corresponded to the unresolved, unstructured N-terminal region. The trimeric construct  
413 in its native state was placed in a rectangular box of dimensions  $\sim 13 \times 15 \times 13$  nm<sup>3</sup> and solvated with  
414  $\sim 80,000$  explicit TIP3P water molecules [29]. Protein parameters corresponded to the  
415 CHARMM36m force field [30]. Chloride ions were used to neutralize the overall system charge.  
416 The total system size corresponded to  $\sim 260,000$  atoms. The energy of the system was minimized  
417 with 25,000 steps using the conjugate gradient algorithm. Equilibration in the *NVT* ensemble was  
418 performed for 1 ns while applying position restraints on all protein heavy atoms with a force  
419 constant of  $\sim 20$  kcal mol<sup>-1</sup> Å<sup>-2</sup>. Equations of motion were integrated through the velocity Verlet  
420 algorithm with a 1 fs time step together with Langevin dynamics to maintain the temperature at  
421 310 K [31]. A cutoff distance of 1.4 nm was used for the short-range neighbor list and for van der  
422 Waals interactions. The Particle Mesh Ewald method was applied for long-range electrostatic  
423 interactions with a 1.2 nm real space cutoff [32]. MDFF was run in 25 steps of 2 ns each, totalling  
424 50 ns of sampling. Each step of MDFF employed a progressive increase in the factor of the grid  
425 scale potential (from 0.3 to 15). All simulations were performed using NAMD software [33] on:  
426 i) an in-house Linux cluster composed of 8 nodes containing 2 GPUs (Nvidia GeForce RTX 2080  
427 Ti) and 24 CPUs (Intel® Xeon® Gold 5118 CPU @ 2.3 GHz) each; and ii) ASPIRE 1, the

428 petascale cluster at the Singapore National Supercomputing Centre, where each simulation  
429 employed 4 nodes each consisting of 1 GPU (Nvidia Tesla K40t) and 24 CPUs (Intel® Xeon®  
430 CPU E5-2690 v3 @ 2.6 GHz). Visualization of simulation snapshots used the Chimera software.

431

#### 432 **ACKNOWLEDGEMENTS:**

433 This work was initiated by a grant from Singapore Ministry of Education Academic research fund  
434 – Tier 1 [MOE2018-T1-A73-114] awarded to G.S.A and further supported by startup funds from  
435 The Pennsylvania State University to G.S.A.

436

#### 437 **FIGURE LEGENDS**

438

439 **Figure 1. Changes in Turnip crinkle virus (TCV) particle upon host entry. (A)** Environmental  
440 changes associated with passive entry of TCV into a plant host include decreases in intracellular  
441  $\text{Ca}^{2+}$  and increased osmolality, which trigger disassembly of the TCV viral particle to release viral  
442 genomic RNA for replication. Complete viral disassembly is preceded by formation of a  
443 disassembly intermediate, the ‘Expanded’ state with a viral particle diameter of  $\sim 380$  Å. Native  
444 (PDB ID: 3ZX8) and ‘Expanded’ (PDB ID: 3ZX9) TCV are in surface representation showing the  
445 3 quasi-equivalent subunits of the TCV basic asymmetric trimeric unit (A – red, B – green, C –  
446 blue). (PDB ID of ‘Native TCV’ – 3ZX8, ‘Expanded TCV’ – 3ZX9) [13]. **(B)** TCV asymmetric  
447 unit with 3 quasi-equivalent conformations A, B and C in red, green and blue, respectively. **(C)**  
448 Cross-section of TCV depicting key interactions between the coat protein and viral genomic RNA.  
449 Three domains of the coat protein Protruding (P Domain), Shell (S Domain) and RNA Binding (R

450 Domain). The contribution of R domain and genomic RNA interactions to TCV metastability are  
451 unknown.

452  
453 **Figure 2. TCV R domain exists in an ensemble of two conformations (A)** Relative Deuterium  
454 fractional uptake (RFU) plot of pepsin fragment peptides of the TCV capsid protein (Native state)  
455 at Dex = 10 min for all peptides listed from the N to C-terminus (X-axis). Orange nodes denote  
456 peptides showing bimodal mass spectra for deuterium exchange while blue nodes represent  
457 peptides showing unimodal (binomial) spectra. ‘\*’ indicates peptides spanning Tyr 66 (site of  
458 limited chymotrypsin proteolysis). Inset shows the mass spectral plot of peptide 66-89 (Dex = 10  
459 min) with low exchanging population distribution outline in blue and high exchanging population  
460 distribution outlined in green. Mass spectral plots comparing the undeuterated and deuterated  
461 states after Dex = 1 min, 10 min, and 30 min for representative peptides from the **(B)** R domain -  
462 66-89, **(C)** S domain - 176-184 and **(D)** P domain - 292-307. Red dotted lines indicate the centroid  
463 masses of each of the spectral envelopes.

464  
465 **Figure 3. Increased proportion of low exchanging R-domain conformation in the expanded**  
466 **state. (A)** Difference plot of absolute number of deuterons exchanged between expanded and  
467 native states of TCV. Each node represents pepsin proteolyzed peptides spanning TCV capsid  
468 protein after 1 (orange), 10 (blue) and 30 min (black) of deuteration respectively. **(B)** Deuterium  
469 uptake differences mapped on to TCV virus structure (PDB ID - 3ZX8) in surface representation  
470 where the red regions represent those exhibiting exchange greater than the 0.5 Da threshold  
471 showing expansion hotspots, and white representing regions showing no change following 10  
472 minutes of deuteration. Cartoon representation of Native and Expanded state of the quasi 3-fold

473 axis. A, B and C conformations are colored in red, green and blue respectively. Bound calcium  
474 ions at homology-based calcium binding sites (E127, D155, D157 and D199) are shown as yellow  
475 circles. **(C)** Mass spectral plot of R domain peptide 66-89 comparing native and expanded states  
476 at Dex = 10 min. The low exchanging population is outlined in blue and the high exchanging  
477 population is outlined in green. **(D)** Mass spectral plot of 3-fold axis representative peptide 150 –  
478 159 from the S domain comparing native and expanded states at Dex = 10 mins.

479

480 **Figure 4. The native virus particle is comprised of low exchanging RNA-bound and free**  
481 **conformations (A)** Size exclusion chromatography of TCV disassembled in the absence of Ca<sup>2+</sup>  
482 and 500 mM NaCl, indicating two well resolved peaks [21] - a fraction containing genomic RNA  
483 (RNA-capsid core complex) eluted first (Peak 1) followed by an RNA-free R-protein at a later  
484 elution volume (Peak 2). **(B)** Comparison of spectral plots of peptide 66-89 between three states-  
485 The RNA-capsid core-complex, Native state and disassembled state at Dex = 10 min. The blue  
486 arrow in the spectral plot of the RNA-capsid core-complex corresponds to the low deuterium  
487 exchanging population. The green arrow represents the free R domain conformation.

488

489 **Figure 5. Structure of the pH 5.4 Expanded TCV capsid at 3.2 Å resolution reveals**  
490 **asymmetry in RNA egress (A)** The reconstruction of the capsid protein shell based on biased  
491 molecular dynamics flexible fitting (MDFF) of a single trimeric asymmetric unit at pH 7.4. The  
492 final snapshot of the trimer was subsequently aligned on the low pH coordinates (PDB: 3ZX8).  
493 The TCV capsid is colored according to the asymmetric unit (A-red, B-green, C-blue) shown in  
494 Figure 1, panel B. **(B)** The cross section of the Cryo-EM density map is colored according to its

495 radius as shown inset. The final correlation of the expanded TCV structure and the cryo-EM  
496 density map resulted in  $\sim 0.80$ .

497

498 **Figure 6. TCV disassembly-assembly model: Viral breathing and RNP complex drives**  
499 **programmed TCV disassembly (A)** Cross-section of TCV in the native state (PDB: 3ZX8,  
500 Diameter = 300 Å) shown encapsidating genomic RNA (black tangled line). RNA interactions  
501 with the capsid protein (blue, pink, and green monomers) are shown as red double-sided arrows.  
502 **(B)** Upon calcium depletion (either in the plant host cell or by addition of EDTA), the TCV particle  
503 expands. The genomic RNA is represented as more ordered with additional contacts between RNA  
504 and capsid shown. The black arrow demonstrates RNA egress from an asymmetric five-fold axis  
505 point. The RNA can be extruded by ribosomes in host cells or particle disassembly can be induced  
506 under high osmolyte conditions.

507

## 508 SUPPLEMENTARY FIGURE LEGENDS

509

510 **Supplementary Figure 1. Primary sequence coverage map of pepsin proteolyzed peptides of**  
511 **TCV coat protein unit.** Coverage map showing 61 Peptides spanning the TCV coat protein unit  
512 - 19 in the R-domain (orange) spanning 1 – 81 out of which 5 peptides overlap the S domains  
513 (blue), 30 in the S-domain spanning 82 - 238 and 12 in the P-domain (green) spanning 239 - 351  
514 with total coverage being 89.2% and 2.87% redundancy. The limited proteolysis site Tyrosine 66  
515 (Y66) is marked in red. All peptides spanning this region are marked with a red bar in region  
516 corresponding to Y66.

517

518 **Supplementary Figure 2. HDEXaminer deconvolution of states in peptide 66-89. (A)**

519 Deconvolved spectra of TCV peptide 66-89 in the native state. The low exchanging population  
520 (yellow) accounts for 5.7% of native state R-domain peptides with an uptake of 6.2 Da. The high  
521 exchanging population (red) accounts for 94.3% of native state R-domain peptides with an uptake  
522 of 11.7 Da. **(B)** Deconvolved spectra of TCV peptide 66-89 in the expanded state. The low  
523 exchanging population (yellow) accounts for 13.6% of expanded state R domain peptides with an  
524 uptake of 1.8 Da. The high exchanging population (red) accounts for 86.4% of R domain peptides  
525 with an uptake of 12.7 Da.

526

527 **Supplementary Figure 3. The rate of limited proteolysis is dependent on osmolyte**

528 **concentration.** SDS-PAGE of limited chymotrypsin proteolysis on TCV coat protein monomer  
529 (10 min digestion, 1:100 w/w of protease and TCV coat protein) for native and NaCl induced states  
530 – 100 mM, 250 mM and 500 mM. The 38 kDa band corresponds to the whole TCV coat protein  
531 unit while the 30 kDa bands have been shown to be a cleavage product consisting of the S and P  
532 domains through N-terminal sequencing [34].

533

534 **Supplementary Figure 4. RMSD of the expanded TCV trimeric axis. (A)** Root mean square

535 deviation (RMSD) plot of the 3-fold axis of the TCV trimer (black) with respect to coordinates of  
536 expanded TCV (black). X-axis represents RMSD in Å and Y-axis represents the simulation time  
537 in ns. **(B)** Cartoon representation overlaid on the surface density of the asymmetric trimeric unit  
538 of TCV in the native state bound to calcium ions (yellow spheres). The A, B and C monomers of



539 TCV are colored in red, green and blue, respectively. In the left is a cross-sectional view and is  
540 rotated 90° and represented as a longitudinal of the asymmetric trimer.

541

542 **Supplementary Figure 5. Addition of NaCl leads to particle disassembly** Comparison of mass  
543 spectral plots of **(A)** R-domain peptide 66-89 and **(B)** S-domain peptide 135-154 from TCV in the  
544 presence of 100 mM, 250 mM and 500 mM NaCl. The low exchanging population for peptide 66-  
545 89 is outlined in blue and the high exchanging population is outlined in green. **(C)** Deuterium  
546 exchange difference plot of TCV with 100 mM (blue), 250 mM (green) and 500 mM NaCl (orange)  
547 relative to the native state at Dex = 10 min. Regions shaded light pink indicate peptides showing  
548 large increases in exchange with NaCl. Listed on X-axis are pepsin-fragment peptides listed from  
549 N to C-terminus. Y-axis corresponds to the absolute differences in deuterium exchanged. Dotted  
550 red lines are indicative of the 0.5 D deuterium exchange difference threshold while the standard  
551 error is represented in grey.

552

## 553 SUPPLEMENTARY TABLES

554 **Supplementary Table 1. Table of fragment peptides and ion products obtained from TCV**  
555 **Native virus after acquiring by MS<sup>E</sup> mode.** Ion product fragmentation profiles of all the 61  
556 peptides of the TCV coat protein in the native state.

557

558

559

## 560 REFERENCES

- 561 1. Kuhn RJ, Dowd KA, Beth Post C, Pierson TC. Shake, rattle, and roll: Impact of the dynamics of flavivirus  
562 particles on their interactions with the host. *Virology*. 2015;479-480:508-517.  
563
- 564 2. Lewis JK, Bothner B, Smith TJ, Siuzdak G. Antiviral agent blocks breathing of the common cold virus.  
565 *Proceedings of the National Academy of Sciences*. 1998;95:6774-6778.  
566
- 567 3. Grigorieff N, Harrison SC. Near-atomic resolution reconstructions of icosahedral viruses from electron  
568 cryo-microscopy. *Curr Opin Struct Biol*. 2011;21:265-273.  
569
- 570 4. Lewis JK, Bothner B, Smith TJ, Siuzdak G. Antiviral agent blocks breathing of the common cold virus.  
571 *Proc Natl Acad Sci U S A*. 1998;95:6774-6778.  
572
- 573 5. Siuzdak G, Lewis JK. Applications of mass spectrometry in combinatorial chemistry. *Biotechnol Bioeng*.  
574 1998;61:127-134.  
575
- 576 6. Lim XX, Chandramohan A, Lim XY, Bag N, Sharma KK, Wirawan M, Wohland T, Lok SM, Anand  
577 GS. Conformational changes in intact dengue virus reveal serotype-specific expansion. *Nat Commun*.  
578 2017;8:14339.  
579
- 580 7. Rexroad J, Evans RK, Middaugh CR. Effect of pH and ionic strength on the physical stability of  
581 adenovirus type 5. *J Pharm Sci*. 2006;95:237-247.  
582
- 583 8. Wilts BD, Schaap IAT, Schmidt CF. Swelling and softening of the cowpea chlorotic mottle virus in  
584 response to pH shifts. *Biophys J*. 2015;108:2541-2549.  
585
- 586 9. Fibriansah G, Ng TS, Kostyuchenko VA, Lee J, Lee S, Wang J, Lok SM. Structural changes in dengue  
587 virus when exposed to a temperature of 37 degrees C. *J Virol*. 2013;87:7585-7592  
588
- 589 10. Llauro A, Coppari E, Imperatori F, Bizzarri AR, Caston JR, Santi L, Cannistraro S, de Pablo PJ.  
590 Calcium ions modulate the mechanics of tomato bushy stunt virus. *Biophys J*. 2015;109:390-397.  
591
- 592 11. Carrington JC, Heaton LA, Zuidema D, Hillman BI, Morris T. The genome structure of turnip crinkle  
593 virus. *Virology*. 1989;170:219-226.  
594
- 595 12. Hogle JM, Maeda A, Harrison SC. Structure and assembly of turnip crinkle virus. I. X-ray  
596 crystallographic structure analysis at 3.2 Å resolution. *J Mol Biol*. 1986;191:625-638.  
597
- 598 13. Bakker SE, Ford RJ, Barker AM, Robottom J, Saunders K, Pearson AR, Ranson NA, Stockley PG.  
599 Isolation of an asymmetric RNA uncoating intermediate for a single-stranded RNA plant virus. *J Mol Biol*.  
600 2012;417:65-78.  
601
- 602 14. Balasubramaniam D, Komives EA. Hydrogen-exchange mass spectrometry for the study of intrinsic  
603 disorder in proteins. *Biochim Biophys Acta*. 2013;1834:1202-1209.  
604
- 605 15. Englander SW, Kallenbach NR. Hydrogen exchange and structural dynamics of proteins and nucleic  
606 acids. *Q Rev Biophys*. 1983;16:521-655.  
607

- 608 16. Ramesh R, Lim XX, Raghuvamsi PV, Wu C, Wong SM, Anand GS. Uncovering metastability and  
609 disassembly hotspots in whole viral particles. *Prog Biophys Mol Biol*. 2019;143:5-12.  
610
- 611 17. Tuma R, Coward LU, Kirk MC, Barnes S, Prevelige PE, Jr. Hydrogen-deuterium exchange as a probe  
612 of folding and assembly in viral capsids. *J Mol Biol*. 2001;306:389-396.  
613
- 614 18. Hoofnagle AN, Resing KA, Ahn NG. Protein analysis by hydrogen exchange mass spectrometry. *Annu*  
615 *Rev Biophys Biomol Struct*. 2003;32:1-25.  
616
- 617 19. Lim X-X, Shu B, Zhang S, Tan AWK, Ng T-S, Lim X-N, Chew VS-Y, Shi J, Screaton GR, Lok S-M,  
618 Anand GS. Human antibody C10 neutralizes by diminishing Zika but enhancing Dengue virus dynamics.  
619 *Cell* 2021 (in press).  
620
- 621 20. Weis DD, Wales TE, Engen JR, Hotchko M, Ten Eyck LF. Identification and characterization of EX1  
622 kinetics in H/D exchange mass spectrometry by peak width analysis. *J Am Soc Mass Spectrom*.  
623 2006;17:1498-1509.  
624
- 625 21. Sorger PK, Stockley PG, Harrison SC. Structure and assembly of turnip crinkle virus. II. Mechanism  
626 of reassembly in vitro. *J Mol Biol*. 1986;191:639-658.  
627
- 628 22. Wei N, Heaton LA, Morris TJ, Harrison SC. Structure and assembly of turnip crinkle virus. VI.  
629 Identification of coat protein binding sites on the RNA. *J Mol Biol*. 1990;214:85-95.  
630
- 631 23. Trabuco LG, Villa E, Schreiner E, Harrison CB, Schulten K. Molecular dynamics flexible fitting: a  
632 practical guide to combine cryo-electron microscopy and X-ray crystallography. *Methods*. 2009;49:174-  
633 180.  
634
- 635 24. Stockley PG, Kirsh AL, Chow EP, Smart JE, Harrison SC. Structure of turnip crinkle virus. III.  
636 Identification of a unique coat protein dimer. *J Mol Biol*. 1986;191:721-725.  
637
- 638 25. Hurtt SS. Detection and Comparison of Electrophorotypes of Hibiscus Chlorotic Ringspot Virus.  
639 *Phytopathology* 1987;77:845-850.  
640
- 641 26. Qu F, Morris TJ. Encapsidation of turnip crinkle virus is defined by a specific packaging signal and  
642 RNA size. *Journal of virology*. 1997;71:1428-1435.  
643
- 644 27. Houde D, Berkowitz SA, Engen JR. The utility of hydrogen/deuterium exchange mass spectrometry in  
645 biopharmaceutical comparability studies. *Journal of pharmaceutical sciences*. 2011;100:2071-2086.  
646
- 647 28. Pettersen EF, Goddard TD, Huang CC, Couch GS, Greenblatt DM, Meng EC, Ferrin TE. UCSF  
648 Chimera--a visualization system for exploratory research and analysis. *J Comput Chem*. 2004;25:1605-  
649 1612.  
650
- 651 29. Jorgensen WL, Chandrasekhar J, Madura JD, Impey RW, Klein ML. Comparison of simple potential  
652 functions for simulating liquid water. *The Journal of Chemical Physics*. 1983;79:926-935.  
653
- 654 30. Huang J, Rauscher S, Nawrocki G, Ran T, Feig M, de Groot BL, Grubmuller H, MacKerell AD, Jr.  
655 CHARMM36m: an improved force field for folded and intrinsically disordered proteins. *Nat Methods*.  
656 2017;14:71-73.  
657

- 658 31. Paterlini MG, Ferguson DM. Constant temperature simulations using the Langevin equation with  
659 velocity Verlet integration. *Chemical Physics*. 1998;236:243-252.  
660
- 661 32. Essmann U, Perera L, Berkowitz ML, Darden T, Lee H, Pedersen LG. A smooth particle mesh Ewald  
662 method. *The Journal of Chemical Physics*. 1995;103:8577-8593.  
663
- 664 33. Phillips JC, Hardy DJ, Maia JDC, Stone JE, Ribeiro JV, Bernardi RC, Buch R, Fiorin G, Héning J, Jiang  
665 W et al. Scalable molecular dynamics on CPU and GPU architectures with NAMD. *The Journal of*  
666 *Chemical Physics*. 2020;153:044130.  
667
- 668 34. Golden JS, Harrison SC. Proteolytic dissection of turnip crinkle virus subunit in solution. *Biochemistry*.  
669 1982;21:3862-3866.

Figure 1

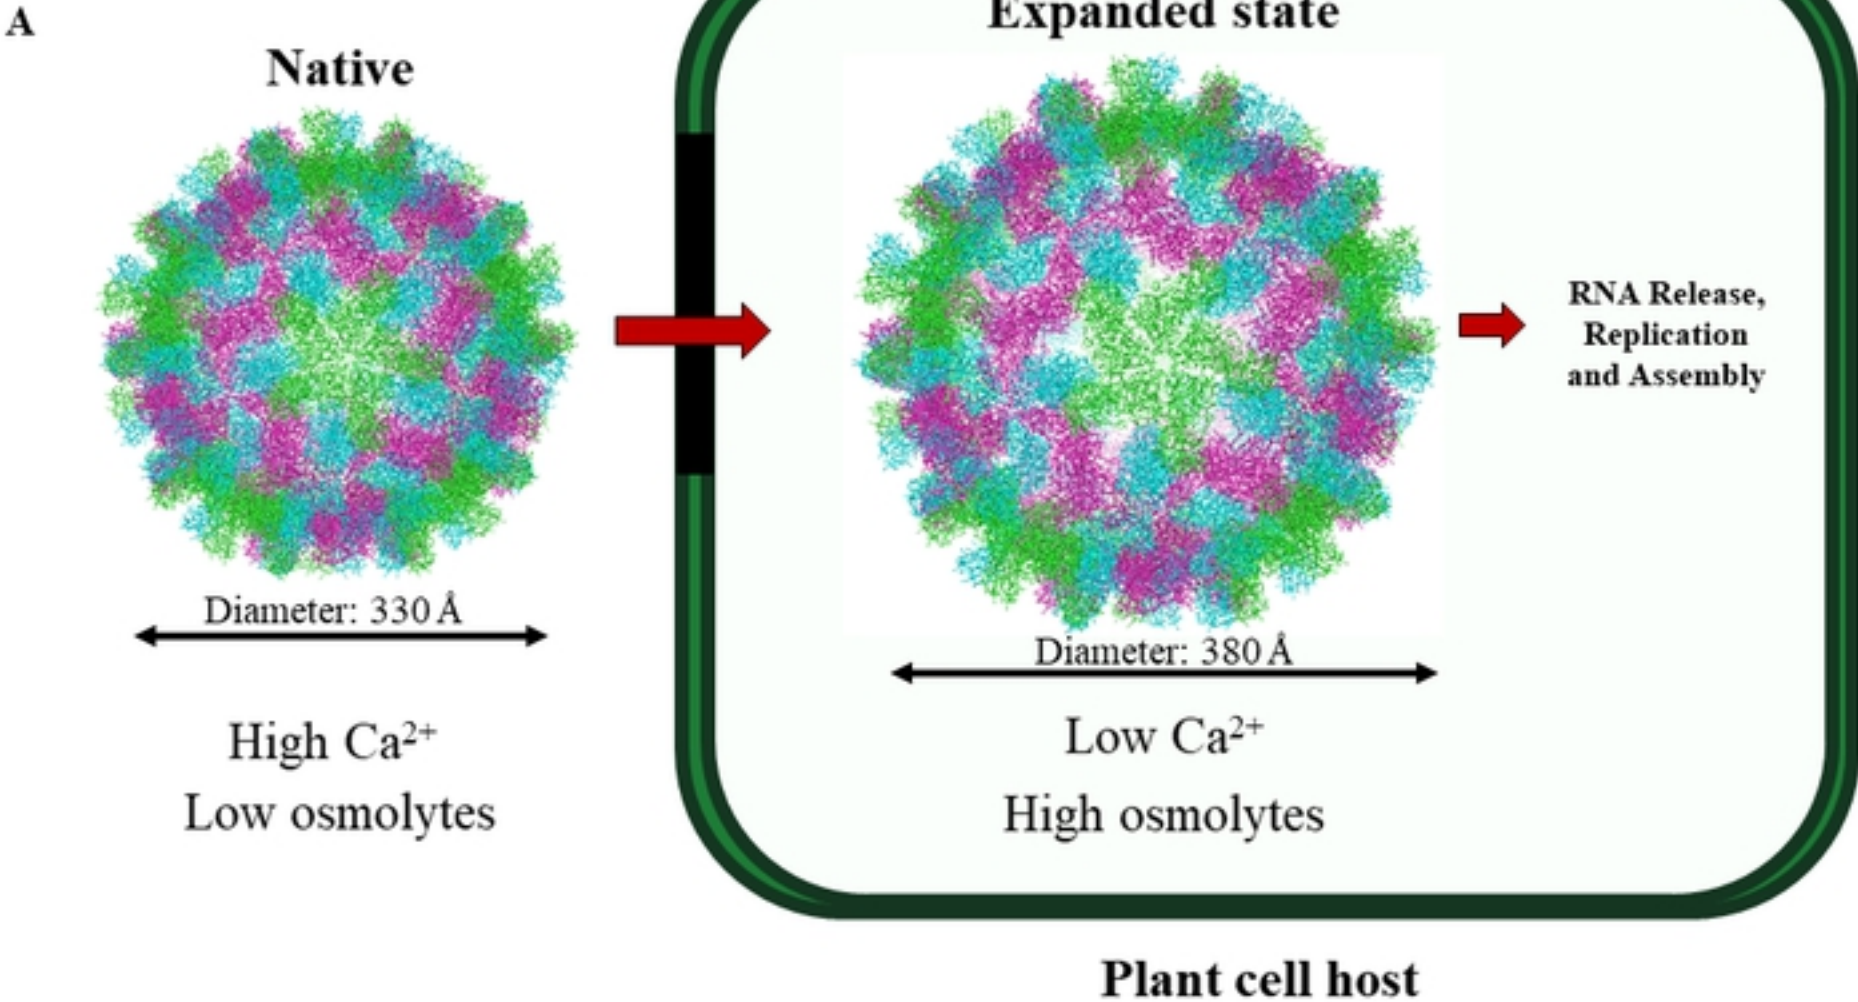

Figure 1A

B

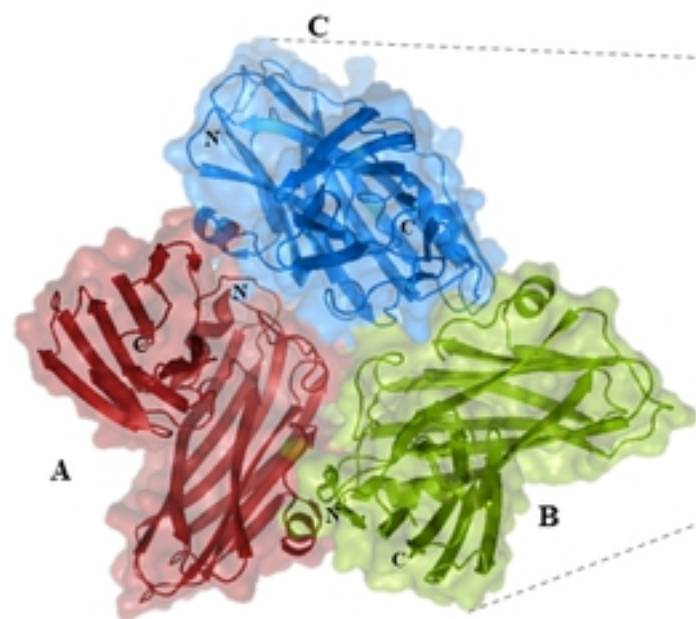

Longitudinal View

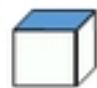

C

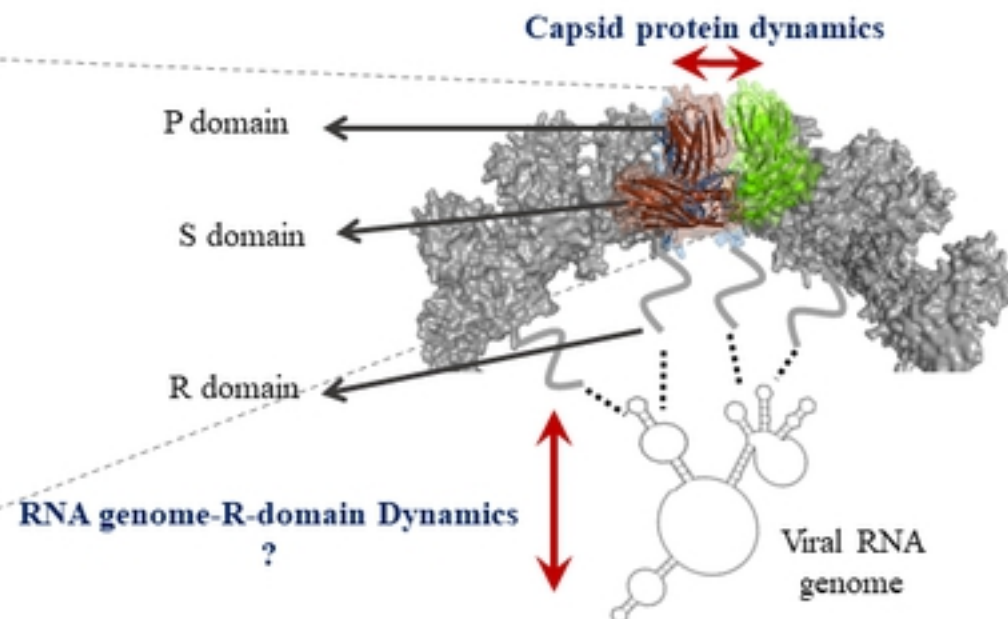

Capsid protein dynamics

P domain

S domain

R domain

RNA genome-R-domain Dynamics ?

Viral RNA genome

Cross-sectional View

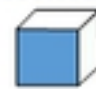

Figure 1B and 1C



Figure 2

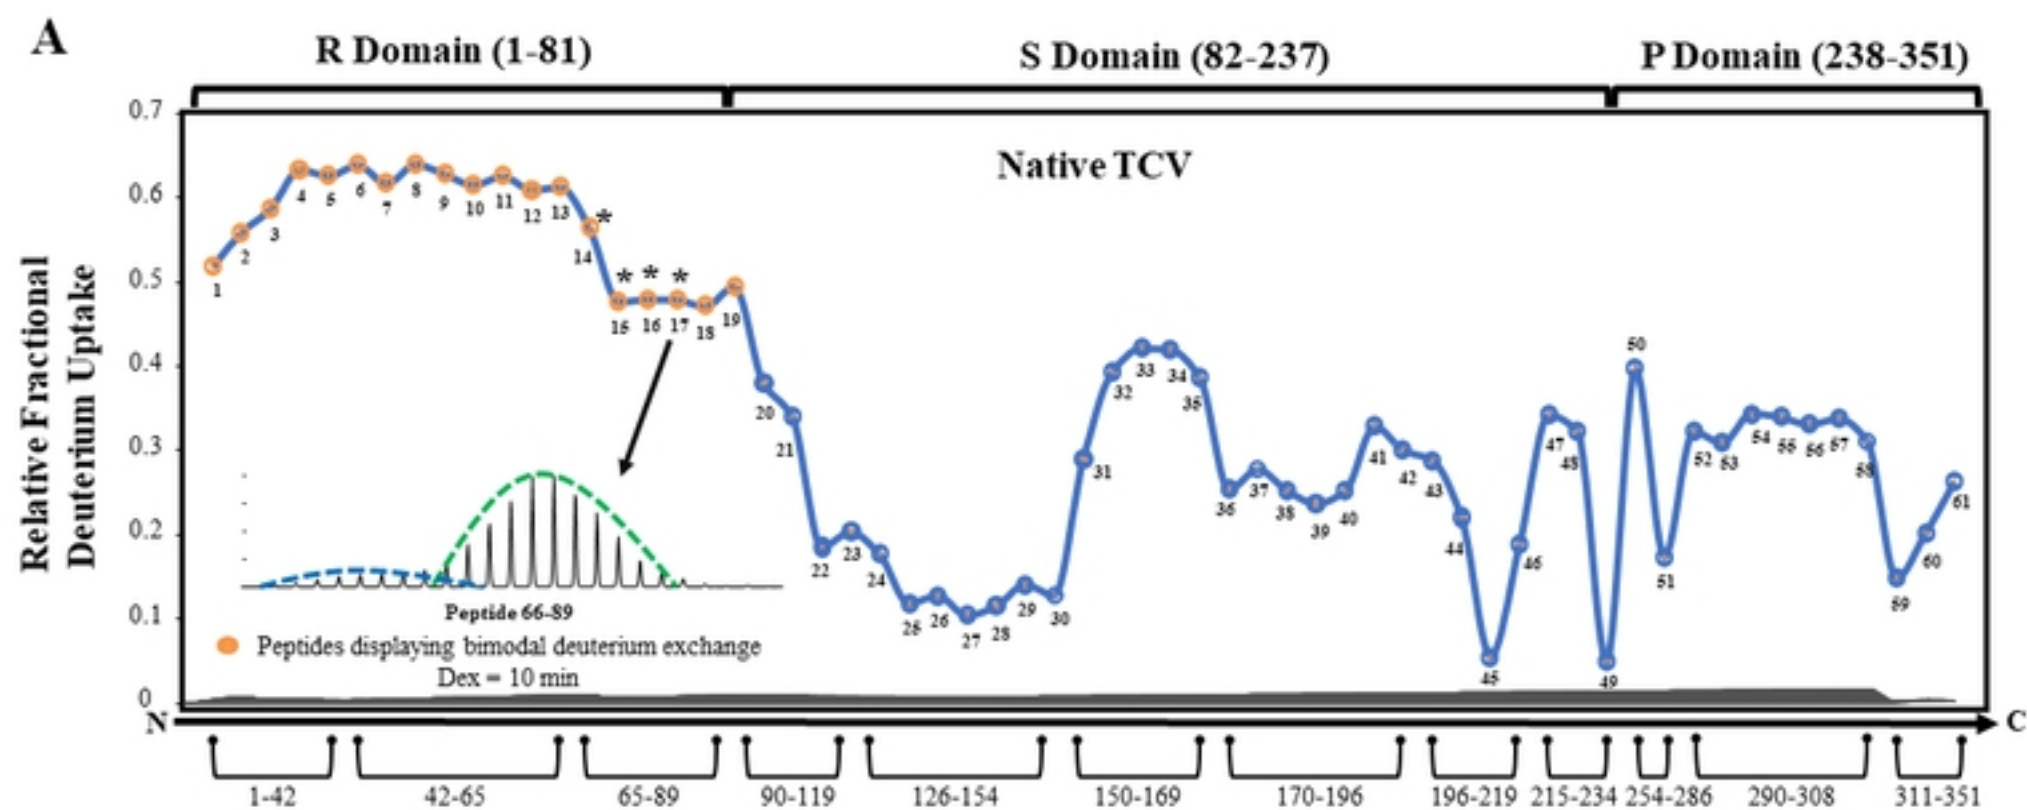

Figure 2A

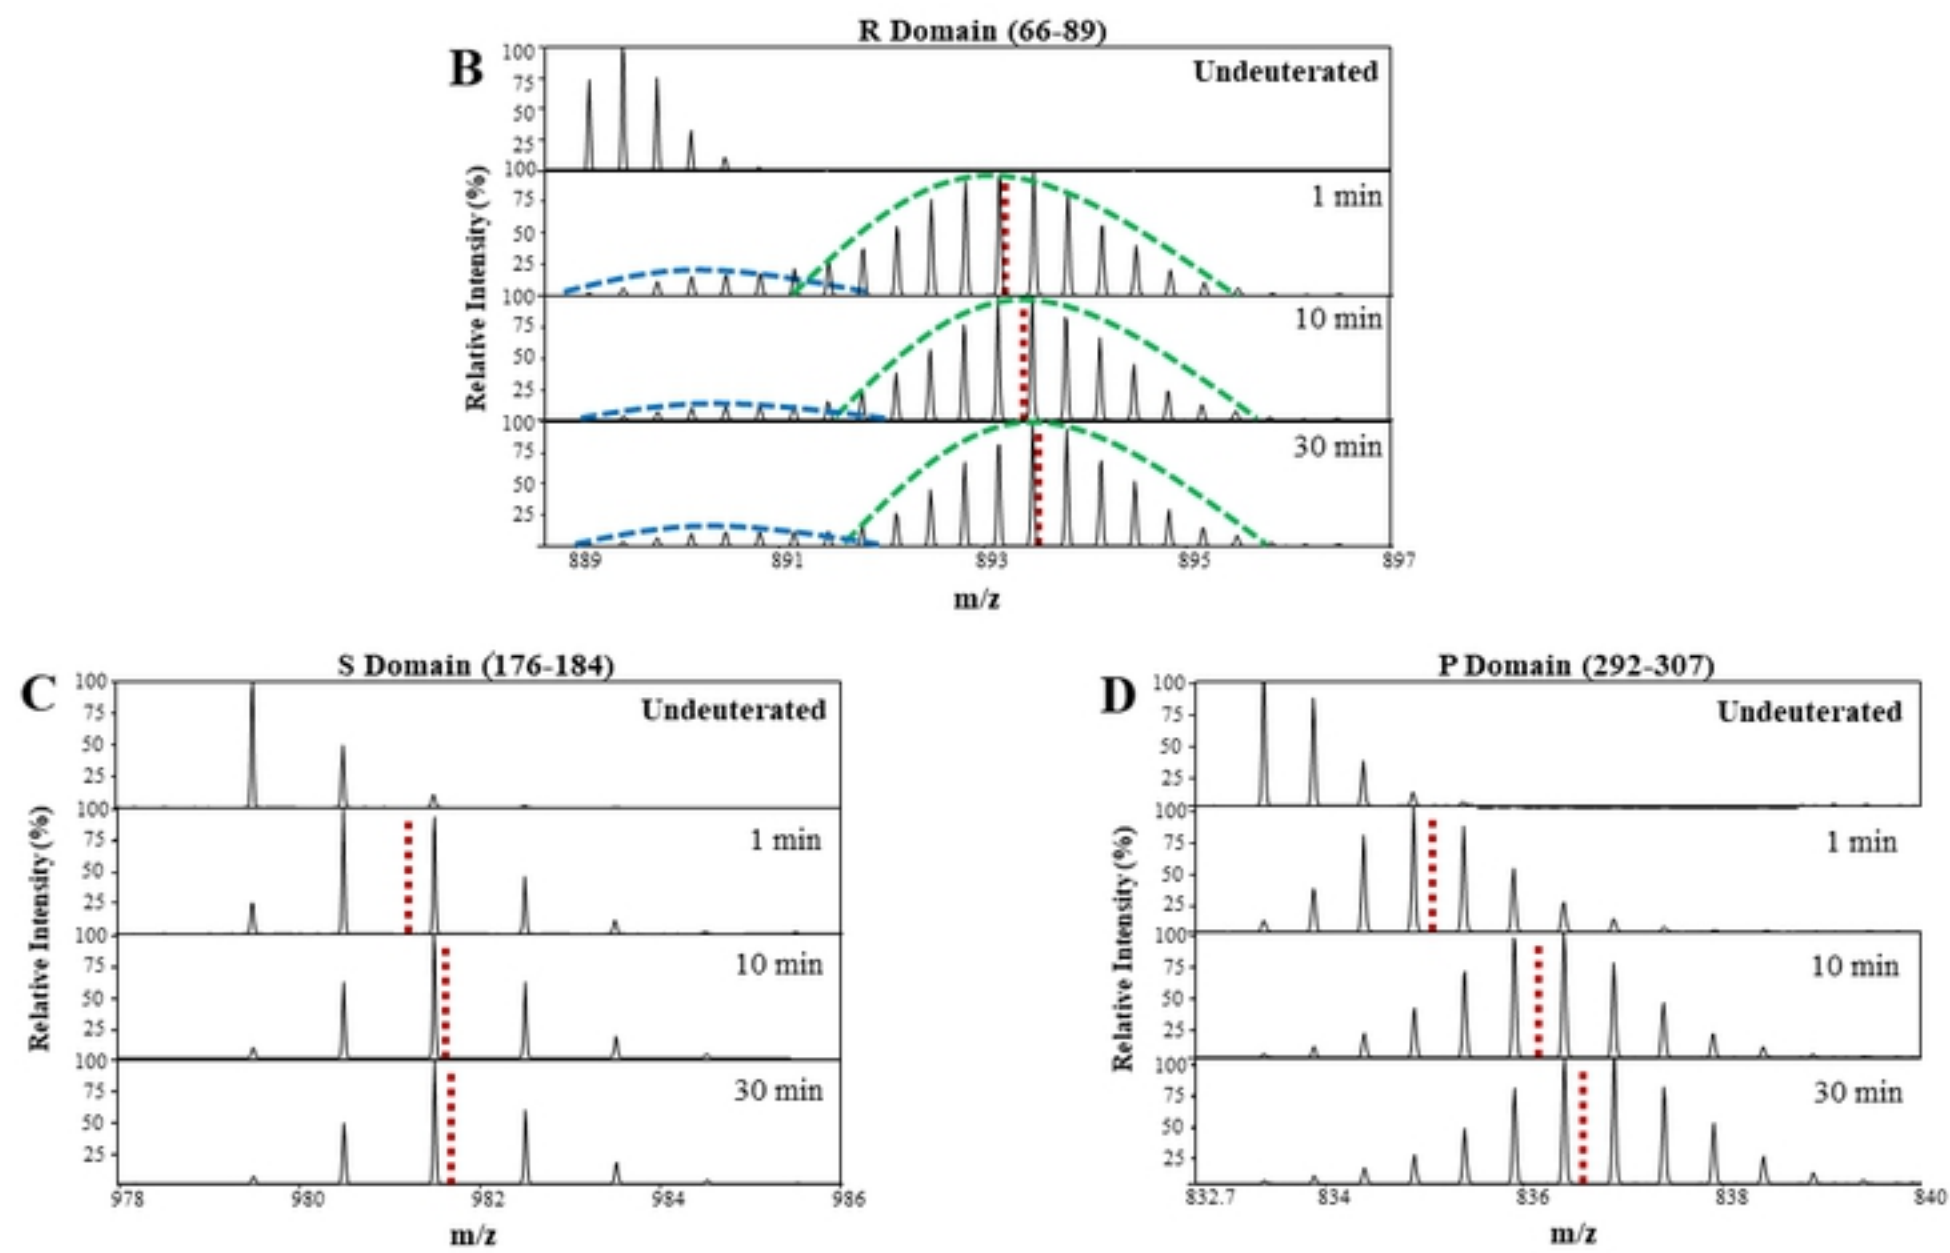

Figure 2B-D



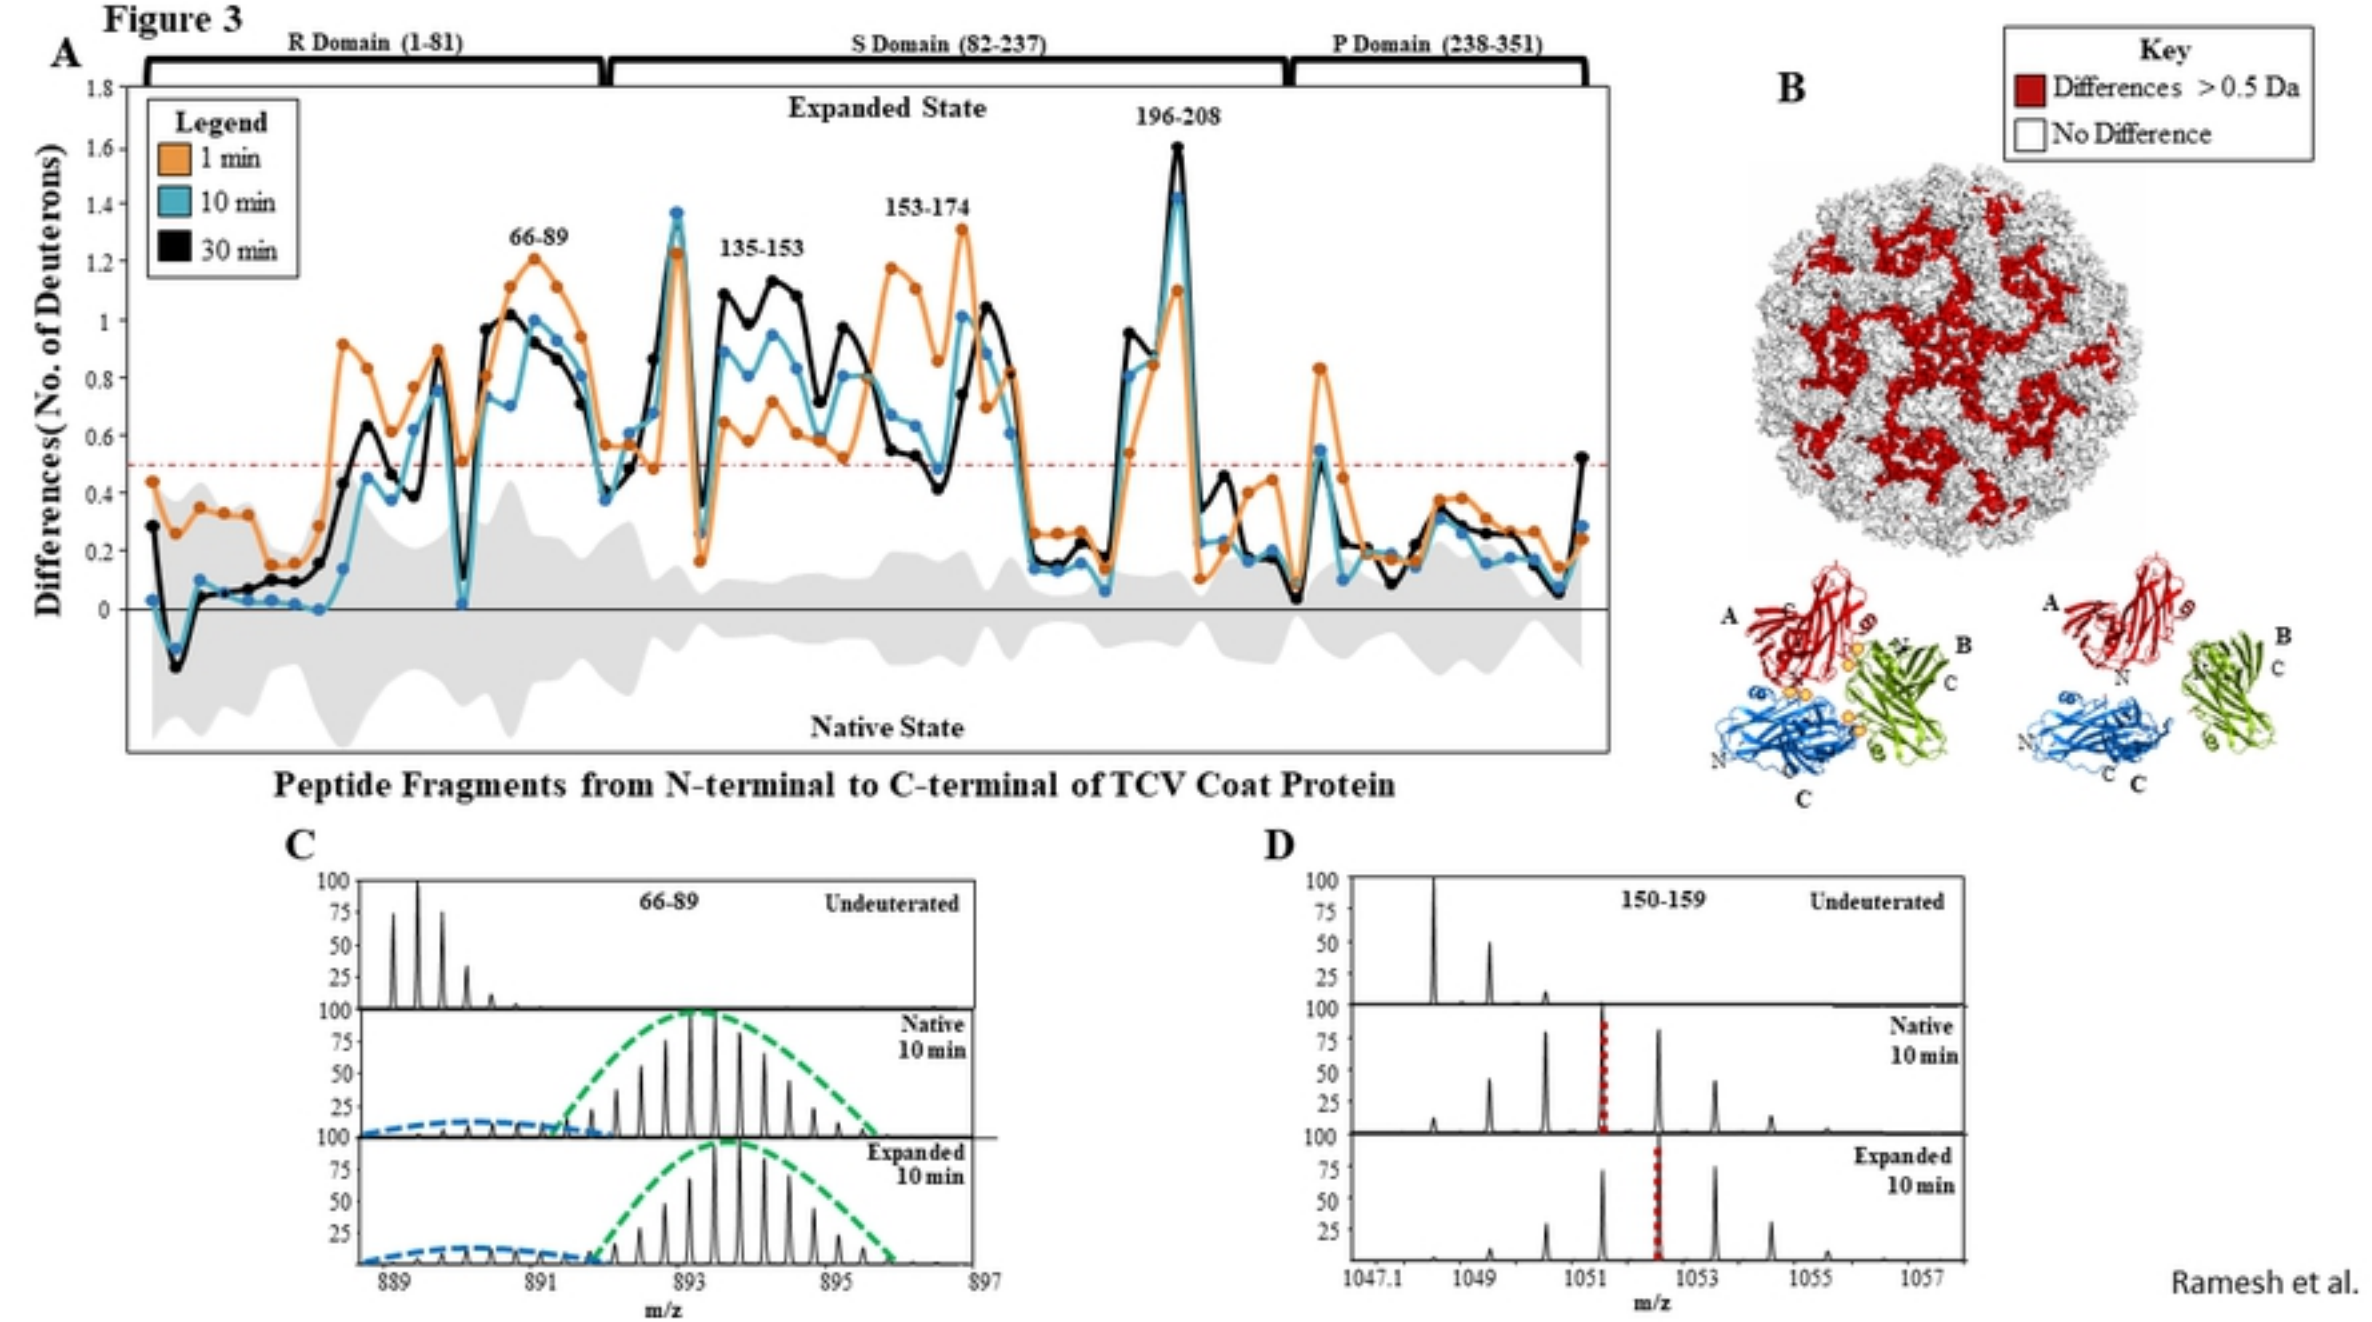

Ramesh et al.

Figure 3

Figure 4

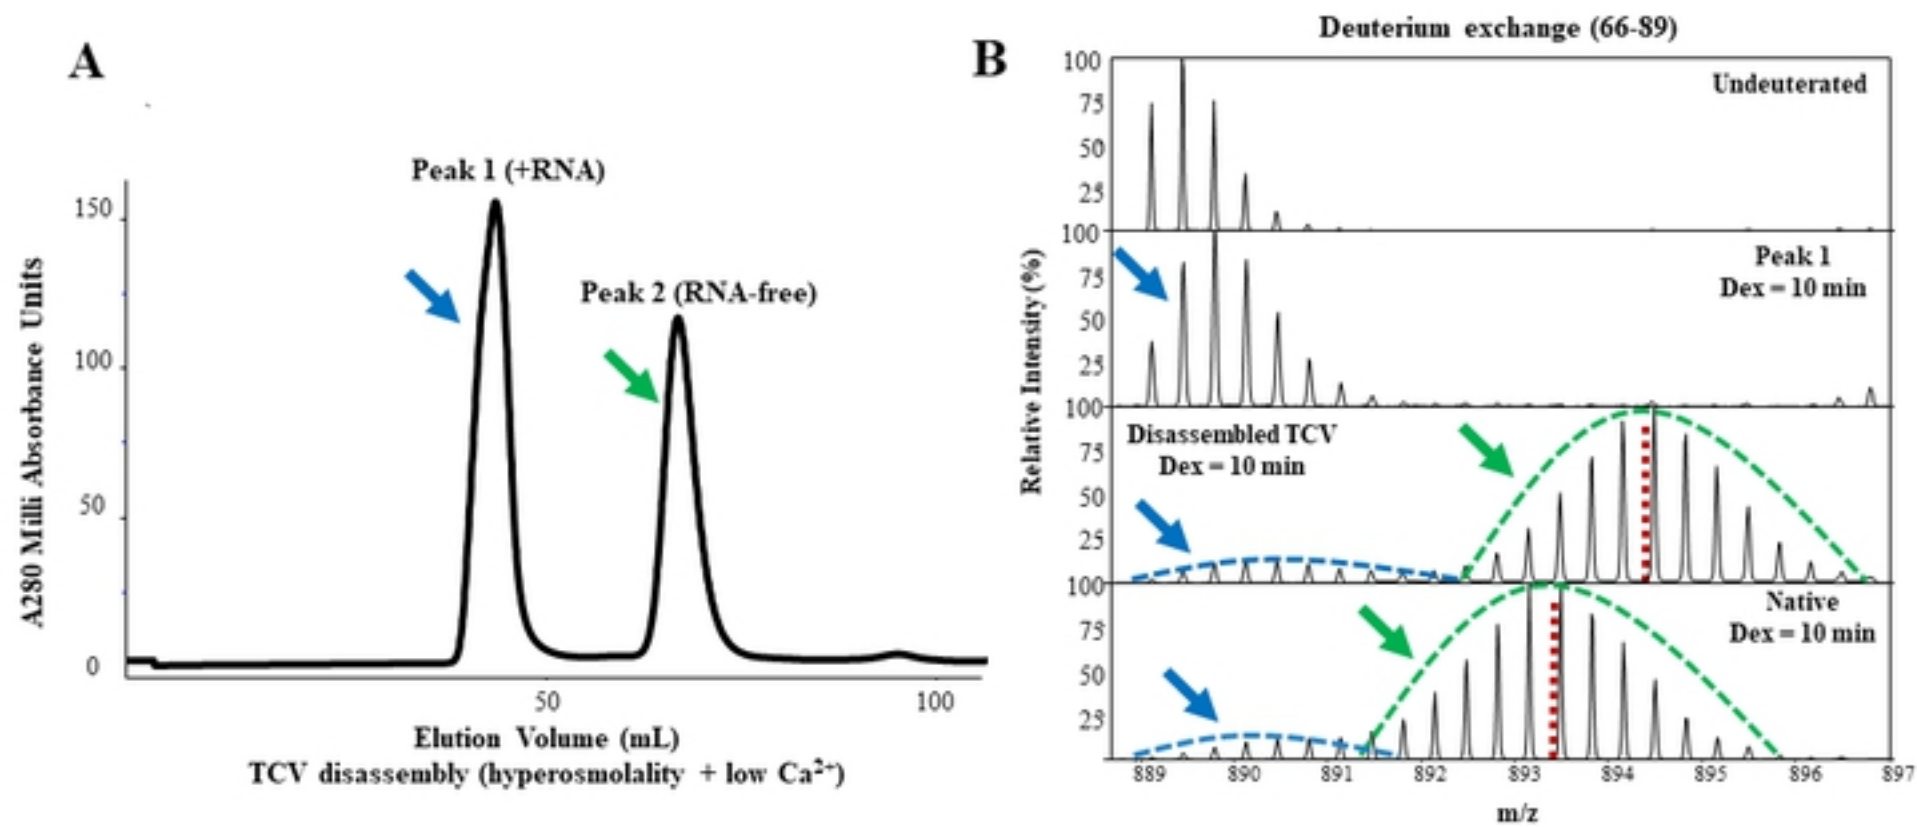

Figure 4



Figure 5

A

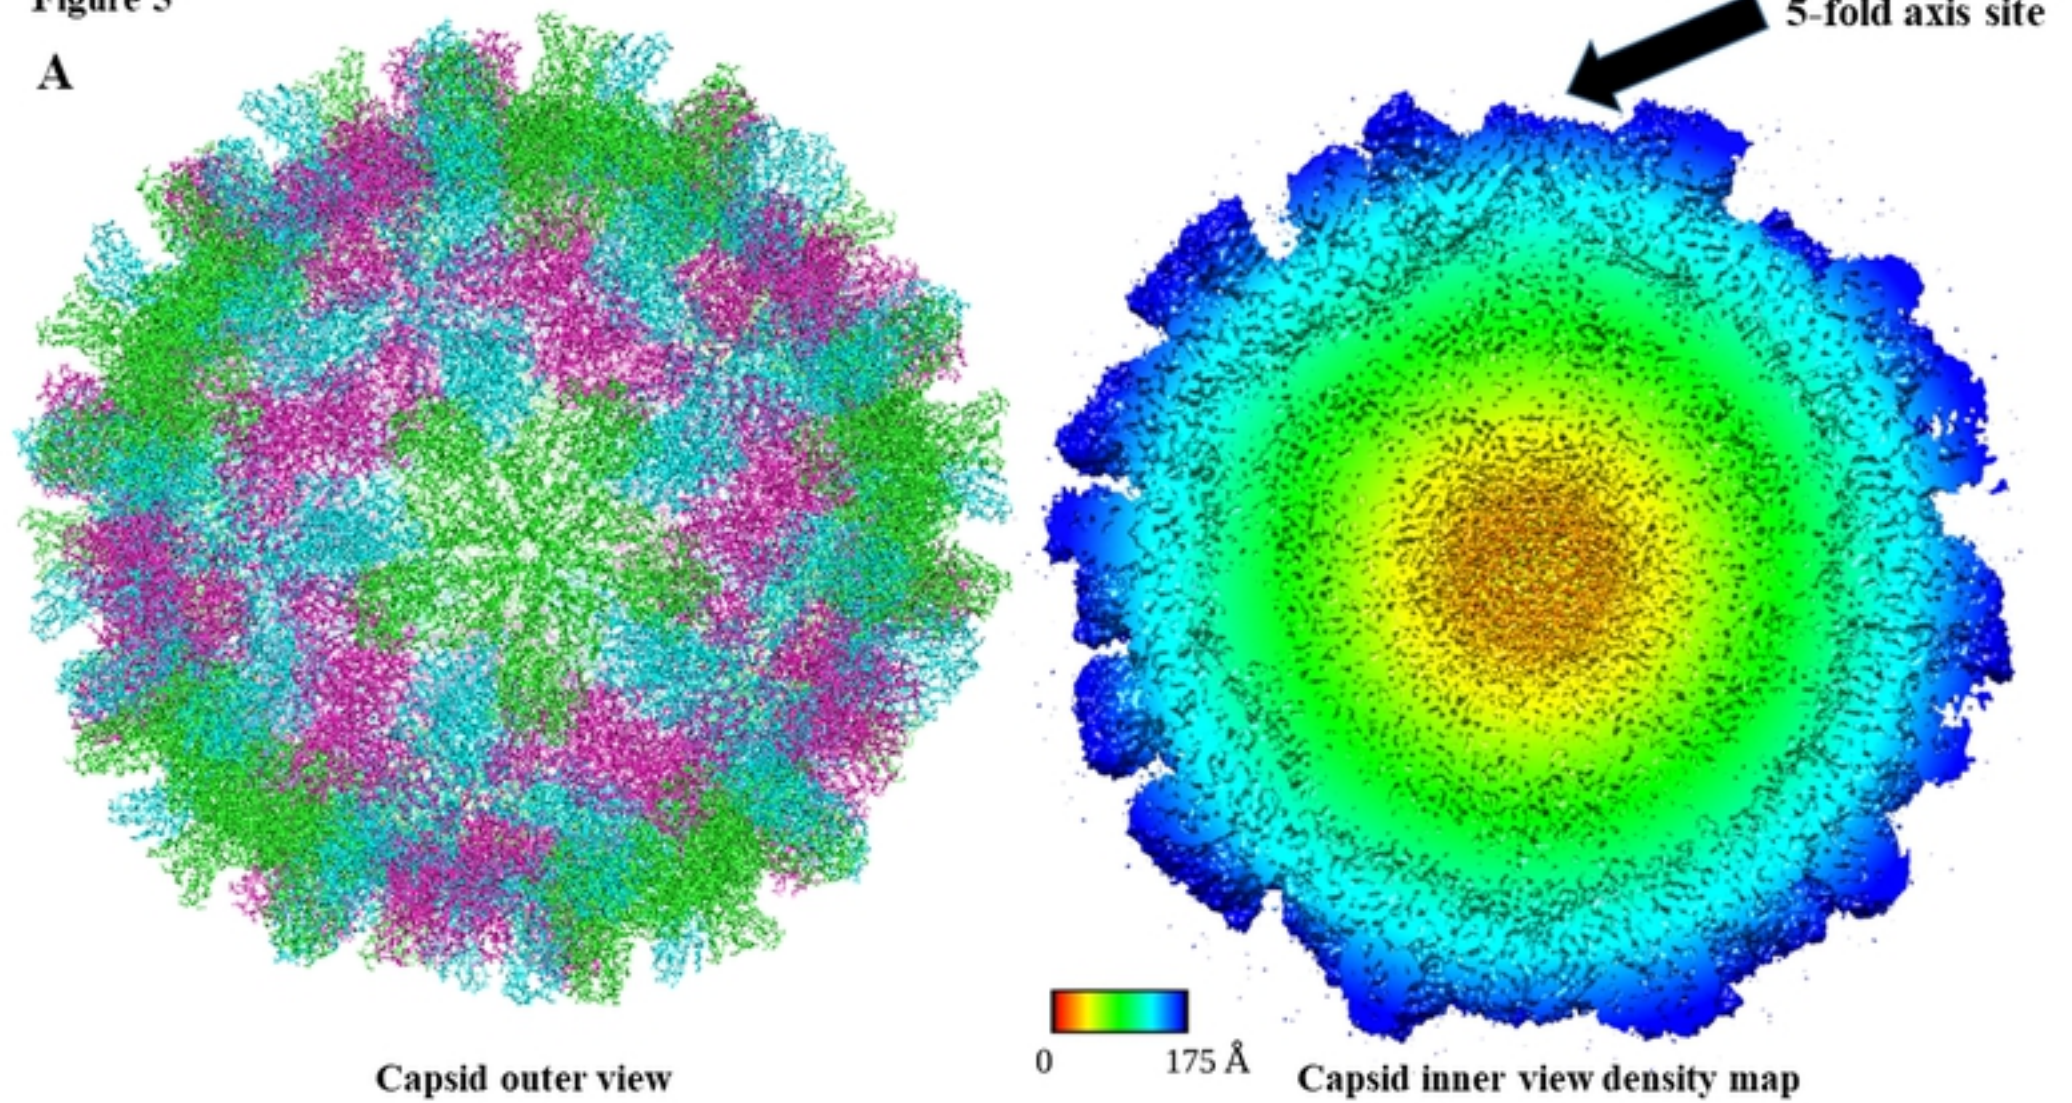

Figure 5A



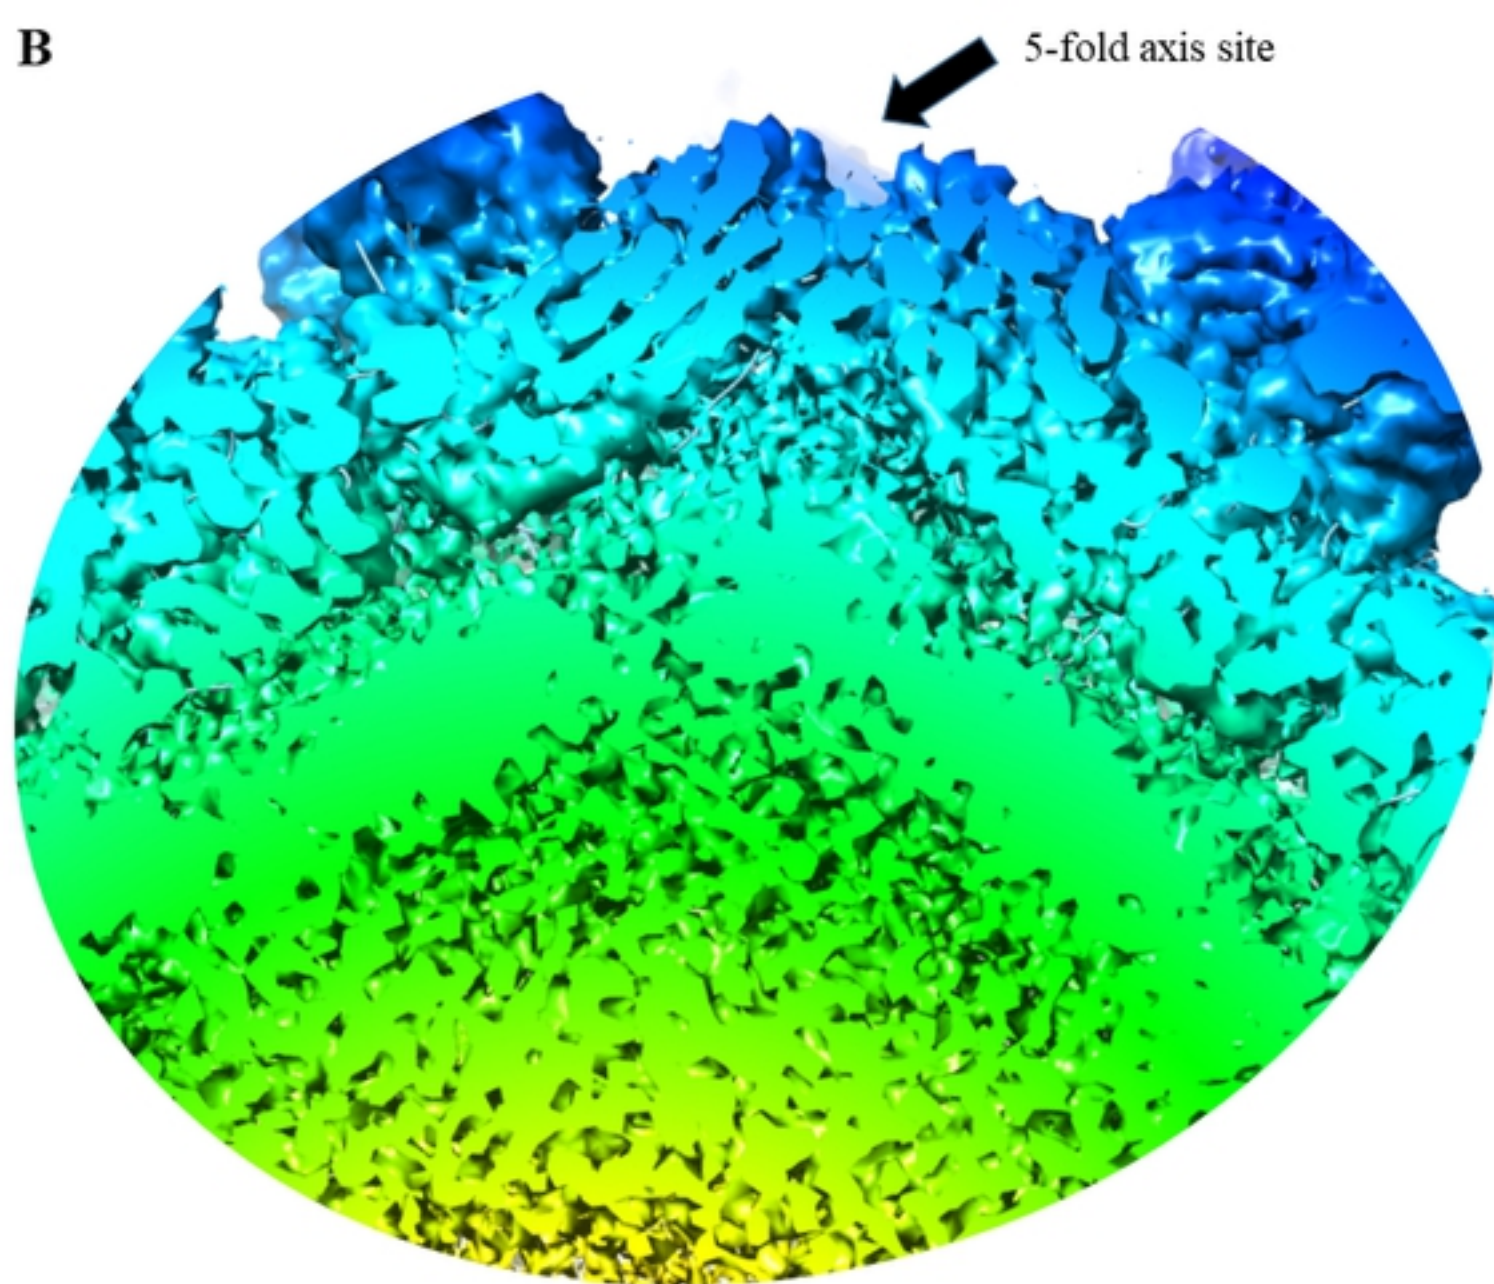

Figure 5B

Figure 6

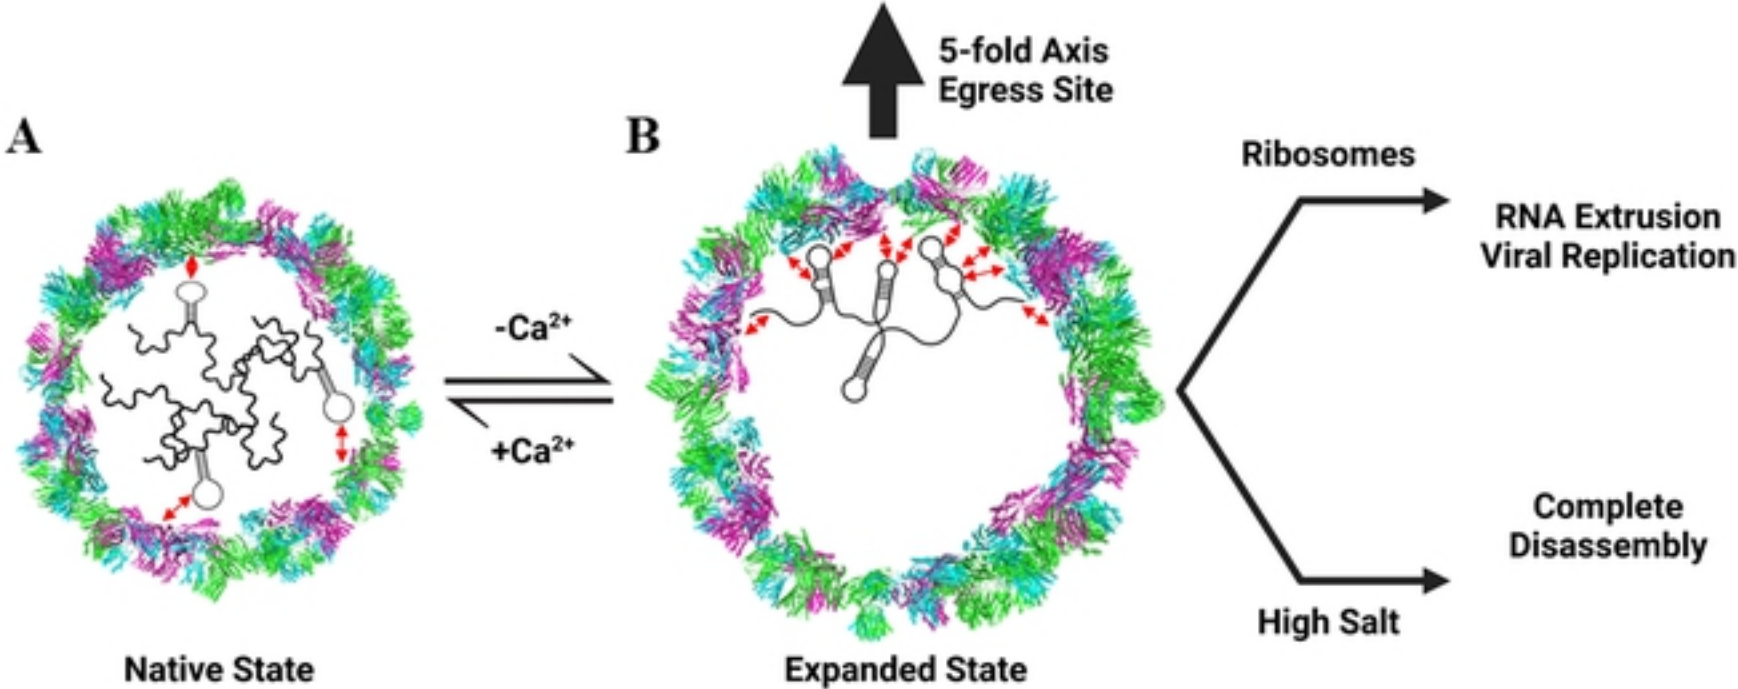

Figure 5B
